# Supplementary material for: Synthesis and physical properties of tris(dialkylamino)cyclopropenium bistriflamide ionic liquids
Source: Royal Society of Chemistry journal article supplement (doi:10.1039/c5ra05254h), 2015-01-01
Supplement: c5ra05254h1.pdf [file c5ra05254h1.pdf]

## Supplementary material

### Synthesis and physical properties of tris(dialkylamino)cyclopropenium bistriflamide ionic liquids

Kelvin J. Walst,<sup>a</sup> Ruhamah Yunis,<sup>a</sup> Paul M. Bayley,<sup>b</sup> Douglas R. MacFarlane,<sup>b</sup> Callum J. Ward,<sup>a</sup> Ruomeng Wang<sup>a</sup> and Owen J. Curnow\*<sup>a</sup>

<sup>a</sup> Department of Chemistry, University of Canterbury, Private Bag 4800, Christchurch 8041, New Zealand. E-mail: [owen.curnow@canterbury.ac.nz](mailto:owen.curnow@canterbury.ac.nz); Fax: +64 3 364 2110; Tel: +64 3 364 2819.

<sup>b</sup> School of Chemistry, Monash University, Wellington Road, Clayton, Victoria 3800, Australia.

| Contents                                                                                                                                                                                      | Page |
|-----------------------------------------------------------------------------------------------------------------------------------------------------------------------------------------------|------|
| Starting material syntheses.                                                                                                                                                                  | 2    |
| Synthesis of triaminocyclopropenium salts.                                                                                                                                                    | 3    |
| Table 1S. <sup>1</sup> H-NMR chemical shift ranges in CDCl <sub>3</sub> .                                                                                                                     | 8    |
| Table 2S. <sup>13</sup> C-NMR chemical shift ranges in CDCl <sub>3</sub> .                                                                                                                    | 8    |
| Table 3S. Density data for peralkyltriaminocyclopropenium bistriflamide ionic liquids.                                                                                                        | 9    |
| Table 4S. Density fitting parameters for peralkyltriaminocyclopropenium bistriflamide ionic liquids.                                                                                          | 9    |
| Table 5S. Molar volumes (mL mol <sup>-1</sup> ) for TDAC bistriflamide ILs.                                                                                                                   | 10   |
| <b>Fig. 1S.</b> Density parameter a versus cation molecular weight for TDAC bistriflamide ILs. Salts <b>3e</b> , <b>9b</b> and <b>10c</b> are indicated by red squares.                       | 10   |
| <b>Fig. 2S.</b> Density parameter b versus cation molecular weight for TDAC bistriflamide ILs. Salts <b>3e</b> , <b>9b</b> and <b>10c</b> are indicated by red squares.                       | 11   |
| <b>Fig. 3S.</b> d (the intercept of ln(ρ) versus T plots) versus cation molecular weight for TDAC bistriflamide ILs. Salts <b>3e</b> , <b>9b</b> and <b>10c</b> are indicated by red squares. | 11   |
| <b>Fig. 4S.</b> A fragility plot for the salts with observed glass transition temperatures.                                                                                                   | 12   |
| <b>Fig. 5S.</b> Log(conductivity) versus molecular weight for TDAC bistriflamide ILs.                                                                                                         | 12   |
| <b>Fig. 6S.</b> Walden plot for <b>3e-g</b> and <b>9d</b> .                                                                                                                                   | 13   |
| Adjusted Walden Plot Discussion                                                                                                                                                               | 14   |

|                                                                                                           |    |
|-----------------------------------------------------------------------------------------------------------|----|
| <b>Fig. 7S.</b> Adjusted Walden plot for TDAC bistriflamide salts.                                        | 14 |
| Table 6S. Viscosity data for hexaalkyltriaminocyclopropenium bistriflamide ionic liquids.                 | 15 |
| Table 7S. Viscosity fit parameters for hexaalkyltriaminocyclopropenium bistriflamide ionic liquids.       | 15 |
| Table 8S. Conductivity data for hexaalkyltriaminocyclopropenium bistriflamide ionic liquids.              | 16 |
| Table 9S. Conductivity fit parameters for hexaalkyltriaminocyclopropenium bistriflamide ionic liquids.    | 16 |
| Table 10S. Water contents of water-saturated ionic liquids at 298 K.                                      | 17 |
| <b>X-ray crystallography</b>                                                                              | 18 |
| Table 11S. Crystallographic data for <b>3a</b> and <b>3c</b> .                                            | 18 |
| <b>Fig 8S.</b> Thermal ellipsoid plot (40% probability) of <b>3a</b> showing the atomic numbering scheme. | 19 |
| <b>Fig 9S.</b> Thermal ellipsoid plot (40% probability) of <b>3c</b> showing the atomic numbering scheme. | 20 |
| Table 12S. Bond Lengths for <b>3a</b> .                                                                   | 21 |
| Table 13S. Bond Angles for <b>3a</b> .                                                                    | 22 |
| Table 14S. Bond lengths for <b>3c</b> .                                                                   | 23 |
| Table 15S. Bond angles for <b>3c</b> .                                                                    | 24 |
| <b>References</b>                                                                                         | 25 |

## Starting material syntheses

**Tris(dimethylamino)cyclopropenium chloride, [C<sub>3</sub>(NMe<sub>2</sub>)<sub>3</sub>]Cl (**1a**).** In a modification of Yoshida and Tawara's procedure,<sup>1</sup> C<sub>3</sub>Cl<sub>5</sub>H (6.91 mL, 49 mmol) was added drop-wise to a stirred aqueous solution of Me<sub>2</sub>NH (40%) (44 g, 392 mmol) at 0 °C for an hour. The solution was left stirring overnight at ambient temperature. The product mixture contained the allyl-diamidinium salt [HC<sub>3</sub>(NMe<sub>2</sub>)<sub>4</sub>]<sup>+</sup> along with **1a** and [Me<sub>2</sub>NH<sub>2</sub>]Cl. The mixture was dissolved in acetonitrile:toluene (2:1) and kept in a freezer overnight to crystallize out ammonium salts. The solution was then dissolved in water (50 mL) and acidified with conc. HCl to pH = 1–2. Salt **1a** was then extracted with CHCl<sub>3</sub> (3 × 50 mL) while leaving behind the diamidinium dication [H<sub>2</sub>C<sub>3</sub>(NMe<sub>2</sub>)<sub>4</sub>]<sup>2+</sup> in the water layer. The CHCl<sub>3</sub> was removed *in vacuo* to give **1a** as an orange solid (3 g, 30%). NMR was consistent with the literature.<sup>1</sup>

**Bis(dimethylamino)cyclopropenone, C<sub>3</sub>(NMe<sub>2</sub>)<sub>2</sub>O.** [C<sub>3</sub>(NMe<sub>2</sub>)<sub>3</sub>]Cl (60 g, 0.295 mol) was added to aqueous NaOH (15%, 150 mL) and heated to 70 °C for 2 h in an open mouth beaker to allow escape of Me<sub>2</sub>NH. The solution was acidified to pH = 2 and the organic compound was extracted from aqueous solution using CHCl<sub>3</sub> (3 × 250 mL). CHCl<sub>3</sub> was removed *in vacuo*, yielding a yellow solid (24 g, 56%). EI-MS: m/z 141.1023 ([MH]<sup>+</sup>), calcd 141.1022. NMR was consistent with the literature.<sup>2</sup>

**Bis(dimethylamino)methoxycyclopropenium methylsulphate, [C<sub>3</sub>(NMe<sub>2</sub>)<sub>2</sub>(OMe)]MeSO<sub>4</sub> (7).** Dried C<sub>3</sub>(NMe<sub>2</sub>)<sub>2</sub>O (2.69 g, 19.2 mmol) was stirred with Me<sub>2</sub>SO<sub>4</sub> (2.36 mL, 25 mmol) for 2 h. The mixture was washed with dry diethyl ether several times to remove methanol and excess Me<sub>2</sub>SO<sub>4</sub>. This gave a viscous orange oil (4.57 g, 90%); <sup>1</sup>H NMR (500 MHz, CDCl<sub>3</sub>): δ 4.15 (s, 3H, OCH<sub>3</sub>), 3.63 (s, 3H, CH<sub>3</sub>SO<sub>4</sub>), 3.16 (s, 12H, NCH<sub>3</sub>); <sup>13</sup>C{<sup>1</sup>H} NMR (126 MHz, CDCl<sub>3</sub>): δ 122.76 (equivalent ring C), 119.89 (unique ring C), 63.87 (OCH<sub>3</sub>), 54.17 (CH<sub>3</sub>SO<sub>4</sub>), 41.13 (NCH<sub>3</sub>); EI-MS: m/z 155.1177 (100%, M<sup>+</sup>), calcd 155.1179. Anal. calcd for C<sub>9</sub>H<sub>18</sub>N<sub>2</sub>O<sub>5</sub>S.1.5H<sub>2</sub>O: C, 38.62; H, 7.02; N, 10.01. Found: C, 38.33; H, 6.93; N, 9.76.

### Synthesis of triaminocyclopropenium salts

**Tris(dipentylamino)cyclopropenium chloride, [C<sub>3</sub>(NPent<sub>2</sub>)<sub>3</sub>]Cl (1e).** NPent<sub>2</sub>H (11.9 g, 75.9 mmol) and NEt<sub>3</sub> (25 mL, 179 mmol) were added to CH<sub>2</sub>Cl<sub>2</sub> (100 mL) and cooled to 0 °C. C<sub>3</sub>Cl<sub>5</sub>H (4.84 g, 22.6 mmol) was added dropwise and the solution stirred overnight at ambient temperature. The solution was heated to reflux for 4 h, and then H<sub>2</sub>O (200 mL) was added. The solution was acidified with aqueous HCl. The CH<sub>2</sub>Cl<sub>2</sub> was separated and washed with H<sub>2</sub>O (3 × 150 mL). Removal of CH<sub>2</sub>Cl<sub>2</sub> *in vacuo* yielded a viscous orange liquid (10.6 g, 90.4% yield); <sup>1</sup>H NMR (500 MHz, CDCl<sub>3</sub>): δ 3.25 (t, <sup>3</sup>J<sub>HH</sub> = 7.7 Hz, 12 H, NCH<sub>2</sub>), 1.57 (m, 12 H, NCH<sub>2</sub>CH<sub>2</sub>), 1.30 (m, 12 H, NCH<sub>2</sub>CH<sub>2</sub>CH<sub>2</sub>), 1.21 (m, 12 H, NCH<sub>2</sub>CH<sub>2</sub>CH<sub>2</sub>CH<sub>2</sub>), 0.85 (t, <sup>3</sup>J<sub>HH</sub> = 7.2 Hz, 18 H, CH<sub>3</sub>); <sup>13</sup>C{<sup>1</sup>H} NMR (126 MHz, CDCl<sub>3</sub>): δ 116.30 (C<sub>3</sub>), 52.86 (NCH<sub>2</sub>), 28.50 (NCH<sub>2</sub>CH<sub>2</sub>), 28.45 (NCH<sub>2</sub>CH<sub>2</sub>CH<sub>2</sub>), 22.16 (NCH<sub>2</sub>CH<sub>2</sub>CH<sub>2</sub>CH<sub>2</sub>), 13.67 (CH<sub>3</sub>); ES-MS<sup>+</sup>: m/z 504.5265 (100%, M<sup>+</sup>), calcd 504.5256; anal. calcd for C<sub>33</sub>H<sub>66</sub>N<sub>3</sub>Cl.1.1H<sub>2</sub>O: C, 70.76; H, 12.27; N, 7.50; found: C, 70.76; H, 12.22; N, 7.65.

**Tris(dipentylamino)cyclopropenium bistriflamide, [C<sub>3</sub>(NPent<sub>2</sub>)<sub>3</sub>]NTf<sub>2</sub> (3e).** Salt **1e** (3.09 g, 5.73 mmol) was stirred with aqueous LiNTf<sub>2</sub> (4.9 g, 19.9 mmol) in water (100 mL). The product was extracted with Et<sub>2</sub>O (200 mL), and additional LiNTf<sub>2</sub> (6.1 g, 21.3 mmol) and H<sub>2</sub>O (100 mL) were added. The Et<sub>2</sub>O was then washed with H<sub>2</sub>O (3 × 100 mL) and dried *in vacuo* to yield an orange liquid (4.30 g, 95.7%); <sup>1</sup>H, <sup>13</sup>C{<sup>1</sup>H} NMR and MS<sup>+</sup> as for [C<sub>3</sub>(NPe<sub>2</sub>)<sub>3</sub>]Cl with additional peaks in the <sup>13</sup>C NMR due to NTf<sub>2</sub><sup>-</sup>; anal. calcd for C<sub>35</sub>H<sub>66</sub>N<sub>4</sub>F<sub>6</sub>O<sub>4</sub>S<sub>2</sub>: C, 53.55; H, 8.47; N, 7.14; found: C, 54.43; H, 8.57; N, 7.23; H<sub>2</sub>O content: 58 ppm; Cl<sup>-</sup> content: 200 ppm.

**Tris(dihexylamino)cyclopropenium chloride, [C<sub>3</sub>(NHex<sub>2</sub>)<sub>3</sub>]Cl (1f).** NHex<sub>2</sub>H (20.8 g, 112 mmol) and NEt<sub>3</sub> (45 mL, 323 mmol) were added to CH<sub>2</sub>Cl<sub>2</sub> (200 mL) and cooled to 0 °C. C<sub>3</sub>Cl<sub>5</sub>H (4.84 g, 22.6 mmol) was added dropwise and the solution stirred overnight at ambient temperature. The solution was heated to reflux for 4 h, then washed with H<sub>2</sub>O (4 × 200 mL). The solution was acidified with aqueous HCl. The CH<sub>2</sub>Cl<sub>2</sub> was separated and washed with H<sub>2</sub>O (4 × 200 mL). Removal of CH<sub>2</sub>Cl<sub>2</sub> *in vacuo* gave a viscous orange liquid (11.8 g, 83.4% yield). <sup>1</sup>H NMR (500 MHz, CDCl<sub>3</sub>): δ 3.29 (t, <sup>3</sup>J<sub>HH</sub> = 8.07 Hz, 12 H, NCH<sub>2</sub>), 1.60 (m, 12 H, NCH<sub>2</sub>CH<sub>2</sub>), 1.28 (m, 36 H, NCH<sub>2</sub>CH<sub>2</sub>(CH<sub>2</sub>)<sub>3</sub>), 0.86 (t, <sup>3</sup>J<sub>HH</sub> = 6.60 Hz, 18 H, N(CH<sub>2</sub>)<sub>5</sub>CH<sub>3</sub>). <sup>13</sup>C{<sup>1</sup>H} NMR (126 MHz, CDCl<sub>3</sub>): δ 116.55 (C<sub>3</sub>), 53.14 (NCH<sub>2</sub>), 31.46 (NCH<sub>2</sub>CH<sub>2</sub>), 28.98 (N(CH<sub>2</sub>)<sub>2</sub>CH<sub>2</sub>), 26.34 (N(CH<sub>2</sub>)<sub>3</sub>CH<sub>2</sub>), 22.50 (N(CH<sub>2</sub>)<sub>4</sub>CH<sub>2</sub>), 13.88 (N(CH<sub>2</sub>)<sub>5</sub>CH<sub>3</sub>). EI-MS<sup>+</sup> as for [C<sub>3</sub>(NHex<sub>2</sub>)<sub>3</sub>]NTf<sub>2</sub>. We were unable to obtain a good microanalysis for this material.

**Tris(dihexylamino)cyclopropenium bistriflamide, [C<sub>3</sub>(NHex<sub>2</sub>)<sub>3</sub>]NTf<sub>2</sub> (3f).** Salt **1f** (3.12 g, 5.00 mmol) was stirred with LiNTf<sub>2</sub> (4.0 g, 14.0 mmol) in water (50 mL). The product was extracted with CH<sub>2</sub>Cl<sub>2</sub> (25 mL) and washed with H<sub>2</sub>O (50 mL). Additional LiNTf<sub>2</sub> (4.0 g, 14.0 mmol) and H<sub>2</sub>O (100 mL) were added. The product was extracted with Et<sub>2</sub>O (100 mL), washed with H<sub>2</sub>O (4 × 100 mL) and dried *in*

*vacuo* to yield an orange liquid (3.91 g, 89.9%).  $^1\text{H}$  and  $^{13}\text{C}\{^1\text{H}\}$  NMR as for  $[\text{C}_3(\text{NHex}_2)_3]\text{Cl}$  with additional peaks in the  $^{13}\text{C}\{^1\text{H}\}$  NMR due to  $\text{NTf}_2^-$ . ES-MS $^+$ : m/z 588.6214 ( $\text{M}^+$ ), calcd 588.6190; anal. calcd for  $\text{C}_{41}\text{H}_{78}\text{N}_4\text{F}_6\text{O}_4\text{S}_2$ : C, 56.66; H, 9.05; N, 6.45; found: C, 57.30; H, 9.22; N, 6.48;  $\text{H}_2\text{O}$  content: 20 ppm;  $\text{Cl}^-$  content: 180 ppm.

**Tris(didecylamino)cyclopropenium chloride,  $[\text{C}_3(\text{NDec}_2)_3]\text{Cl}$  (1g).**  $\text{NDec}_2\text{H}$  (13.8 g, 46.3 mmol) and  $\text{NEt}_3$  (15 mL, 108 mmol) were added to  $\text{CH}_2\text{Cl}_2$  (100 mL) and cooled to 0 °C.  $\text{C}_3\text{Cl}_5\text{H}$  (2.84 g, 13.2 mmol) was added dropwise and the solution stirred overnight at ambient temperature. The solution was heated to reflux for 6 h, then  $\text{H}_2\text{O}$  was added (200 mL). The solution was acidified with aqueous HCl, separated and washed again with dilute aqueous HCl. The  $\text{CH}_2\text{Cl}_2$  was separated and washed with  $\text{H}_2\text{O}$  ( $3 \times 150$  mL). Removal of  $\text{CH}_2\text{Cl}_2$  *in vacuo* yielded a viscous orange liquid and white precipitate. After addition of acetone and cooling in the freezer, the precipitate was removed by filtration through silica gel three times. Removal of acetone *in vacuo* yielded an orange liquid (9.46 g, 74.5% yield);  $^1\text{H}$  NMR (500 MHz,  $\text{CDCl}_3$ ):  $\delta$  3.26 (t,  $^3J_{\text{HH}} = 7.7$  Hz, 12 H,  $\text{NCH}_2$ ), 1.57 (m, 12 H,  $\text{NCH}_2\text{CH}_2$ ), 1.23 (m, 84 H,  $\text{N}(\text{CH}_2)_2(\text{CH}_2)_7$ ), 0.83 (t,  $^3J_{\text{HH}} = 7.0$  Hz, 18 H,  $\text{N}(\text{CH}_2)_9\text{CH}_3$ );  $^{13}\text{C}\{^1\text{H}\}$  NMR (126 MHz,  $\text{CDCl}_3$ ):  $\delta$  116.49 ( $\text{C}_3$ ), 53.11 ( $\text{NCH}_2$ ), 31.78 ( $\text{NCH}_2\text{CH}_2$ ), 29.50 ( $\text{N}(\text{CH}_2)_2\text{CH}_2$ ), 29.44 ( $\text{N}(\text{CH}_2)_3\text{CH}_2$ ), 29.34 ( $\text{N}(\text{CH}_2)_4\text{CH}_2$ ), 29.21 ( $\text{N}(\text{CH}_2)_5\text{CH}_2$ ), 29.01 ( $\text{N}(\text{CH}_2)_6\text{CH}_2$ ), 26.66 ( $\text{N}(\text{CH}_2)_7\text{CH}_2$ ), 22.57 ( $\text{N}(\text{CH}_2)_8\text{CH}_2$ ), 14.00 ( $\text{N}(\text{CH}_2)_9\text{CH}_3$ ); ES-MS $^+$ : m/z 924.9965 (100%,  $\text{M}^+$ ), calcd 924.9946; anal. calcd for  $\text{C}_{63}\text{H}_{126}\text{N}_3\text{Cl} \cdot 0.6\text{H}_2\text{O}$ : C, 77.86; H, 13.19; N, 4.32; found: C, 77.86; H, 13.23; N, 4.43.

**Tris(didecylamino)cyclopropenium bistriflamide,  $[\text{C}_3(\text{NDec}_2)_3]\text{NTf}_2$  (3g).** Salt **1g** (3.05 g, 3.18 mmol) was stirred with  $\text{LiNTf}_2$  (4.0 g, 14.0 mmol).  $\text{H}_2\text{O}$  (100 mL) was added and product extracted with  $\text{Et}_2\text{O}$  (200 mL). Additional  $\text{LiNTf}_2$  (4.0 g, 14.0 mmol) and  $\text{H}_2\text{O}$  (100 mL) were added. The solution was again extracted with  $\text{Et}_2\text{O}$  and washed with  $\text{H}_2\text{O}$  ( $3 \times 100$  mL) before drying *in vacuo* to yield an orange liquid (3.18 g, 83.0%);  $^1\text{H}$ ,  $^{13}\text{C}\{^1\text{H}\}$  NMR and MS $^+$  as for  $[\text{C}_3(\text{NDec}_2)_3]\text{Cl}$  with additional peaks in the  $^{13}\text{C}\{^1\text{H}\}$  NMR due to  $\text{NTf}_2^-$ ; anal. calcd for  $\text{C}_{65}\text{H}_{126}\text{N}_4\text{F}_6\text{O}_4\text{S}_2$ : C, 64.74; H, 10.53; N, 4.65; found: C, 64.80; H, 10.57; N, 4.84;  $\text{H}_2\text{O}$  content: 38 ppm;  $\text{Cl}^-$  content: 195 ppm.

**Tris(ethylmethylamino)cyclopropenium bistriflamide,  $[\text{C}_3(\text{NEtMe}_2)_3]\text{NTf}_2$  (4a).**  $\text{C}_3\text{Cl}_5\text{H}$  (4.27 mL, 33 mmol) was added dropwise to a stirred solution of  $\text{MeEtNH}$  (10 mL, 116 mmol) and  $\text{Et}_3\text{N}$  (18.55 mL, 132 mmol) in  $\text{CH}_2\text{Cl}_2$  (20 mL) at 0 °C for an hour. The solution was left on stirring overnight at ambient temperature. The product was a mixture of the open ring  $[\text{HC}_3(\text{NMeEt})_4]\text{Cl}$  with  $[\text{C}_3(\text{NMeEt})_3]\text{Cl}$  and  $[\text{MeEtNH}_2]\text{Cl}$ . The mixture was dissolved in water (50 mL) and acidified with conc. HCl to pH = 1-2.  $[\text{C}_3(\text{NMeEt})_3]\text{Cl}$  was then extracted with  $\text{CHCl}_3$  ( $3 \times 50$  mL) while leaving behind the dication of the open ring product,  $[\text{H}_2\text{C}_3(\text{NMeEt})_4]^{2+}$  in the water layer.  $[\text{C}_3(\text{NMeEt})_3]\text{Cl}$  was then stirred with  $\text{LiNTf}_2$  (8.09 g, 27 mmol) in  $\text{H}_2\text{O}$  (10 mL). The solvent was removed *in vacuo*, the mixture was dissolved in  $\text{CHCl}_3$  (30 mL), and the product was washed with conc. HCl ( $3 \times 30$  mL) to remove the open ring product, followed by washing the organic layer with water ( $3 \times 30$  mL). The solvent was removed *in vacuo* to give a light brown oil (3.70 g, 80%);  $^1\text{H}$  NMR (400 MHz,  $\text{CDCl}_3$ ):  $\delta$  3.38 (q,  $^3J_{\text{HH}} = 6.8$  Hz, 6H,  $\text{NCH}_2$ ), 3.09 (s, 9H,  $\text{NCH}_3$ ), 1.27 (t,  $^3J_{\text{HH}} = 6.8$  Hz, 6H,  $\text{NCH}_2\text{CH}_3$ );  $^{13}\text{C}\{^1\text{H}\}$  NMR (100 MHz,  $\text{CDCl}_3$ ):  $\delta$  119.92 (q,  $^1J_{\text{CF}} = 324$  Hz,  $\text{CF}_3$ ), 118.96 (ring C), 50.05 ( $\text{NCH}_2$ ), 39.00 ( $\text{NCH}_3$ ), 12.81 ( $\text{NCH}_2\text{CH}_3$ ); ESI MS: m/z 210.1967 ( $\text{M}^+$ ), calcd 210.1965; Anal. calcd for  $\text{C}_{14}\text{H}_{24}\text{N}_4\text{O}_4\text{S}_2\text{F}_6$ : C, 34.28; H, 4.93; N, 11.42. Found: C, 34.84; H, 5.18; N, 11.58;  $\text{H}_2\text{O}$  content: 990 ppm;  $\text{Cl}^-$  content: 130 ppm.

**Tris(octadecylmethylamino)cyclopropenium chloride,  $[\text{C}_3(\text{NStMe})_3]\text{Cl}$  (2c).**  $\text{N}(\text{C}_{18}\text{H}_{37})\text{MeH}$  (11.6 g, 40.9 mmol) and  $\text{NEt}_3$  (14.5 g, 143 mmol) were added to  $\text{CH}_2\text{Cl}_2$  (100 mL) and cooled to 0 °C.  $\text{C}_3\text{Cl}_5\text{H}$

(2.84 g, 13.2 mmol) was added dropwise and the solution stirred for 60 h at ambient temperature. The solution was heated to reflux for 20 h. The solvent was removed *in vacuo* and the product extracted from an aqueous solution using  $\text{CHCl}_3$ . The organic solvent was removed under vacuum. The product was washed with petroleum ether ( $2 \times 50$  mL) to remove residual amine and dried *in vacuo* to give a light yellow solid (10.2 g, 81.4%);  $^1\text{H}$  NMR (300 MHz,  $\text{CDCl}_3$ ):  $\delta$  3.33 (t,  $^3J_{\text{HH}} = 7.6$  Hz, 6H,  $\text{NCH}_2\text{C}_{17}\text{H}_{35}$ ), 3.17 (s, 9H,  $\text{NCH}_3$ ), 1.60 (m, 6H,  $\text{NCH}_2\text{CH}_2\text{C}_{16}\text{H}_{33}$ ), 1.12–34 (m, 90H,  $\text{NC}_2\text{H}_4\text{C}_{15}\text{H}_{30}\text{CH}_3$ ), 0.85 (t,  $^3J_{\text{HH}} = 6.5$  Hz, 9H,  $\text{NC}_{17}\text{H}_{34}\text{CH}_3$ );  $^{13}\text{C}\{^1\text{H}\}$  NMR (75 MHz,  $\text{CDCl}_3$ ):  $\delta$  116.99 ( $\text{C}_3$ ), 55.70 ( $\text{NCH}_2$ ), 40.31 ( $\text{NCH}_3$ ), 31.90, 28.72–30.42, 28.05, 26.66, 22.66, 14.10 ( $\text{CH}_3$ ); ES-MS:  $m/z$  882.9465 (100%,  $\text{M}^+$ ), calcd 882.9477; anal. calcd for  $\text{C}_{60}\text{H}_{120}\text{N}_3\text{Cl}_2 \cdot 2.2\text{H}_2\text{O}$ : C, 75.17; H, 13.08; N, 4.38; found: C, 75.18; H, 12.86; N, 4.56.

**Tris(octadecylmethylamino)cyclopropenium bistriflamide,  $[\text{C}_3(\text{NStMe})_3]\text{NTf}_2$  (4c).** Salt **2c** (4.00 g, 4.35 mmol) was stirred with  $\text{LiNTf}_2$  (5.00 g, 17.4 mmol) in  $\text{H}_2\text{O}$  (100 mL). The product was extracted with chloroform (100 mL), washed with  $\text{H}_2\text{O}$  ( $3 \times 50$  mL) and dried *in vacuo* to yield a yellow liquid (4.30 g, 84.9%);  $^1\text{H}$ ,  $^{13}\text{C}\{^1\text{H}\}$  NMR and  $\text{MS}^+$  as for  $[\text{C}_3(\text{NStMe})_3]\text{Cl}$  with an additional peak in the  $^{13}\text{C}\{^1\text{H}\}$  NMR due to  $\text{NTf}_2^-$ ; anal. calcd for  $\text{C}_{62}\text{H}_{120}\text{N}_4\text{F}_6\text{O}_4\text{S}_2 \cdot 1.5\text{H}_2\text{O}$ : C, 62.54; H, 10.41; N, 4.71; found: C, 62.54; H, 10.24; N, 4.87.

**Bis(dimethylamino)diethylaminocyclopropenium bistriflamide,  $[\text{C}_3(\text{NMe}_2)_2(\text{NEt}_2)]\text{NTf}_2$  (9a).** Salt **7** (4.6 g, 17.4 mmol) was stirred with  $\text{NEt}_2\text{H}$  (2.34 mL, 23 mmol) in dry  $\text{CH}_2\text{Cl}_2$  (5 mL) for 2 h in an inert atmosphere.  $\text{CH}_2\text{Cl}_2$  was removed *in vacuo*. The mixture was washed with dry diethylether several times to remove excess amine. The mixture was dissolved in ice cold water, and the product was extracted with  $\text{CHCl}_3:\text{EtOH}$  (2:1) ( $3 \times 30$  mL). The solvent was removed *in vacuo* to give  $[\text{C}_3(\text{NMe}_2)_2(\text{NEt}_2)]\text{MeSO}_4$  as a light yellow oil, which was then stirred with  $\text{LiNTf}_2$  (14.98 g, 52 mmol) in  $\text{H}_2\text{O}$  (20 mL) and the product is extracted with  $\text{CHCl}_3$  ( $3 \times 30$  mL) and the solvent was removed *in vacuo*, the mixture was dissolved in  $\text{EtOH}$ , kept in a freezer overnight and filtered off to give white crystals (3.0 g, 36%);  $^1\text{H}$  NMR (400 MHz,  $\text{CDCl}_3$ ):  $\delta$  3.39 (q,  $^3J_{\text{HH}} = 7.0$  Hz, 4H,  $\text{NCH}_2$ ), 3.12 (s, 12H,  $\text{NCH}_3$ ), 1.26 (t,  $^3J_{\text{HH}} = 7.0$  Hz, 6H,  $\text{NCH}_2\text{CH}_3$ );  $^{13}\text{C}\{^1\text{H}\}$  NMR (100 MHz,  $\text{CDCl}_3$ ):  $\delta$  119.91 (q,  $^1J_{\text{CF}} = 322$  Hz,  $\text{CF}_3$ ), 117.74 (equivalent ring C), 116.41 (unique ring C), 47.45 ( $\text{NCH}_2$ ), 42.11 ( $\text{NCH}_3$ ), 13.74 ( $\text{NCH}_2\text{CH}_3$ ); EI-MS:  $m/z$  196.1810 ( $\text{M}^+$ ); calcd 196.1808; Anal. calcd for  $\text{C}_{13}\text{H}_{22}\text{N}_4\text{O}_4\text{S}_2\text{F}_6$ : C, 32.78; H, 4.65; N, 11.76. Found: C, 33.01; H, 4.64; N, 11.89;  $\text{H}_2\text{O}$  content: 120 ppm;  $\text{Cl}^-$  content: 345 ppm.

**Bis(dimethylamino)dipropylaminocyclopropenium bistriflamide,  $[\text{C}_3(\text{NMe}_2)_2(\text{NPr}_2)]\text{NTf}_2$  (9b).** Salt **7** (5.43 g, 20 mmol) was stirred with  $\text{NPr}_2\text{H}$  (3.6 mL, 26 mmol) in  $\text{CH}_2\text{Cl}_2$  (5 mL) for 2 h in an inert atmosphere.  $\text{CH}_2\text{Cl}_2$  was removed *in vacuo*. The mixture was washed with dry diethyl ether several times to remove excess amine. The mixture was dissolved in ice cold water and the product was extracted with  $\text{CHCl}_3:\text{EtOH}$  (2:1) ( $3 \times 30$  mL). The solvent was removed *in vacuo* to give  $[\text{C}_3(\text{NMe}_2)_2(\text{NPr}_2)]\text{MeSO}_4$  as a brown solid which was then stirred with  $\text{LiNTf}_2$  (9.0 g, 32 mmol) in  $\text{H}_2\text{O}$  (20 mL). The product was extracted with  $\text{CHCl}_3$  ( $3 \times 50$  mL) and the solvent was then removed *in vacuo* to give a brown solid (5.0 g, 94%);  $^1\text{H}$  NMR ( $\text{CDCl}_3$ , 400 MHz):  $\delta$  3.26 (t,  $^3J_{\text{HH}} = 7.6$  Hz, 4H,  $\text{NCH}_2\text{CH}_2$ ), 3.12 (s, 12H,  $\text{NCH}_3$ ), 1.66 (m, 4H,  $\text{NCH}_2\text{CH}_2$ ), 0.93 (t,  $^3J_{\text{HH}} = 7.0$  Hz, 6H,  $\text{NCH}_2\text{CH}_2\text{CH}_3$ );  $^{13}\text{C}\{^1\text{H}\}$  NMR ( $\text{CDCl}_3$ , 100 MHz):  $\delta$  120.10 (q,  $^1J_{\text{CF}} = 322$  Hz,  $\text{CF}_3$ ), 117.65 (equivalent ring C), 116.76 (unique ring C), 55.05 ( $\text{NCH}_2$ ), 42.22 ( $\text{NCH}_3$ ), 21.86 ( $\text{NCH}_2\text{CH}_2$ ), 10.81 ( $\text{NCH}_2\text{CH}_2\text{CH}_3$ ); EI-MS:  $m/z$  224.2125 ( $\text{M}^+$ ); calcd 224.2121; Anal. calcd for  $\text{C}_{15}\text{H}_{26}\text{N}_4\text{O}_4\text{S}_2\text{F}_6$ : C, 35.71; H, 5.19; N, 11.10. Found: C, 35.92; H, 5.2; N, 11.22;  $\text{H}_2\text{O}$  content: 760 ppm;  $\text{Cl}^-$  content: 760 ppm.

**Bis(dimethylamino)dibutylaminocyclopropenium bistriflamide, [C<sub>3</sub>(NMe<sub>2</sub>)<sub>2</sub>(NBu<sub>2</sub>)]NTf<sub>2</sub> (9c).** Salt **7** (2.4 g, 9 mmol) was stirred with NBu<sub>2</sub>H (1.97 mL, 12 mmol) in dry CH<sub>2</sub>Cl<sub>2</sub> (5 mL) for 2 h. CH<sub>2</sub>Cl<sub>2</sub> was removed *in vacuo* and excess amine was removed by washing several times with dry diethylether to yield [C<sub>3</sub>(NMe<sub>2</sub>)<sub>2</sub>(NBu<sub>2</sub>)]MeSO<sub>4</sub> as a light yellow oil, which was then stirred with LiNTf<sub>2</sub> (6.92 g, 24 mmol) in water (10 mL). The solvent was removed *in vacuo*, the mixture was dissolved in CHCl<sub>3</sub>:EtOH (2:1, 30 mL), and the product was washed with ice cold water (3 × 30 mL) to remove ammonium salts. The solvent was then removed *in vacuo* to yield a light yellow oil (3.4 g, 80%); <sup>1</sup>H NMR (400 MHz, CDCl<sub>3</sub>): δ 3.28 (t, <sup>3</sup>J<sub>HH</sub> = 7.6 Hz, 4H, NCH<sub>2</sub>), 3.11 (s, 12H, NCH<sub>3</sub>), 1.60 (m, 4H, NCH<sub>2</sub>CH<sub>2</sub>), 1.32 (m, 4H, NCH<sub>2</sub>CH<sub>2</sub>CH<sub>2</sub>), 0.94 (t, <sup>3</sup>J<sub>HH</sub> = 7.6 Hz, 6H, NCH<sub>2</sub>CH<sub>2</sub>CH<sub>2</sub>CH<sub>3</sub>); <sup>13</sup>C{<sup>1</sup>H} NMR (126 MHz, CDCl<sub>3</sub>): δ 119.89 (q, <sup>1</sup>J<sub>CF</sub> = 322 Hz, CF<sub>3</sub>), 117.59 (equivalent ring C), 116.66 (unique ring C), 53.22 (NCH<sub>2</sub>), 42.17 (NCH<sub>3</sub>), 30.56 (NCH<sub>2</sub>CH<sub>2</sub>), 19.79 (NCH<sub>2</sub>CH<sub>2</sub>CH<sub>2</sub>), 13.65 (NCH<sub>2</sub>CH<sub>2</sub>CH<sub>2</sub>CH<sub>3</sub>); EI-MS: m/z 252.2435 (M<sup>+</sup>); calcd 252.2434; Anal. calcd for C<sub>17</sub>H<sub>30</sub>N<sub>4</sub>O<sub>4</sub>S<sub>2</sub>F<sub>6</sub>: C, 38.34; H, 5.68; N, 10.52. Found: C, 39.30; H, 5.87; N, 10.71; H<sub>2</sub>O content: 760 ppm; Cl<sup>-</sup> content: 490 ppm.

**Bis(dimethylamino)dihexylaminocyclopropenium bistriflamide, [C<sub>3</sub>(NMe<sub>2</sub>)<sub>2</sub>(NHex<sub>2</sub>)]NTf<sub>2</sub> (9d).** Salt **7** (2 g, 8 mmol) was stirred with NHex<sub>2</sub>H (2.3 mL, 10 mmol) in dry CH<sub>2</sub>Cl<sub>2</sub> (5 mL) for 2 h. CH<sub>2</sub>Cl<sub>2</sub> was removed *in vacuo*, the mixture was dissolved in ice cold water, and the product was extracted with CHCl<sub>3</sub>:EtOH (2:1, 3 × 30 mL). The solvent was removed *in vacuo* to yield [C<sub>3</sub>(NMe<sub>2</sub>)<sub>2</sub>(NHex<sub>2</sub>)]MeSO<sub>4</sub> as a light yellow oil, which was then stirred with LiNTf<sub>2</sub> (5.22 g, 18 mmol) in H<sub>2</sub>O (10 mL). The solvent was removed *in vacuo*, the mixture was dissolved in CHCl<sub>3</sub>:EtOH (2:1, 30 mL), and the product was washed with ice cold water (3 × 30 mL) to remove ammonium salts. The solvent was removed *in vacuo* to yield a light yellow oil (3 g, 80%); <sup>1</sup>H NMR (400 MHz, CDCl<sub>3</sub>): δ 3.28 (t, <sup>3</sup>J<sub>HH</sub> = 8.0 Hz, 4H, NCH<sub>2</sub>), 3.11 (s, 12H, NCH<sub>3</sub>), 1.61 (m, 4H, NCH<sub>2</sub>CH<sub>2</sub>), 1.29 (m, 12H, NCH<sub>2</sub>CH<sub>2</sub>CH<sub>2</sub>CH<sub>2</sub>CH<sub>2</sub>CH<sub>2</sub>), 0.88 (t, <sup>3</sup>J<sub>HH</sub> = 6.8 Hz, 6H, NCH<sub>2</sub>CH<sub>2</sub>CH<sub>2</sub>CH<sub>2</sub>CH<sub>2</sub>CH<sub>3</sub>); <sup>13</sup>C{<sup>1</sup>H} NMR (100 MHz, CDCl<sub>3</sub>): δ 120.06 (q, <sup>1</sup>J<sub>CF</sub> = 347 Hz, CF<sub>3</sub>), 117.69 (equivalent ring C), 116.73 (unique ring C), 53.52 (NCH<sub>2</sub>), 42.18 (NCH<sub>3</sub>), 31.32 (NCH<sub>2</sub>CH<sub>2</sub>), 28.55 (NCH<sub>2</sub>CH<sub>2</sub>CH<sub>2</sub>), 26.23 (NCH<sub>2</sub>CH<sub>2</sub>CH<sub>2</sub>CH<sub>2</sub>), 22.21 (NCH<sub>2</sub>CH<sub>2</sub>CH<sub>2</sub>CH<sub>2</sub>CH<sub>2</sub>), 13.41 (CH<sub>2</sub>CH<sub>3</sub>). EI-MS: m/z 308.3064 (M<sup>+</sup>); calcd 308.3060; Anal. calcd for C<sub>21</sub>H<sub>38</sub>N<sub>4</sub>O<sub>4</sub>S<sub>2</sub>F<sub>6</sub>: C, 42.85; H, 6.51; N, 9.52. Found: C, 43.30; H, 6.69; N, 9.35; H<sub>2</sub>O content: 520 ppm; Cl<sup>-</sup> content: 160 ppm.

**Bis(dimethylamino)ethylaminocyclopropenium bistriflamide, [C<sub>3</sub>(NMe<sub>2</sub>)<sub>2</sub>(NEtH)]NTf<sub>2</sub> (13a).** Salt **7** (8.82 g, 33 mmol) was stirred with NEtH<sub>2</sub> (3.25 mL, 43 mmol) in dry CH<sub>2</sub>Cl<sub>2</sub> (20 mL) for 30 minutes in an inert atmosphere. CH<sub>2</sub>Cl<sub>2</sub> was removed *in vacuo*. The mixture was washed with dry diethyl ether several times to remove excess amine. The mixture was dissolved in water, and the product was extracted with CHCl<sub>3</sub> (3 × 30 mL). The solvent was removed *in vacuo* to give [C<sub>3</sub>(NMe<sub>2</sub>)<sub>2</sub>(NEtH)]MeSO<sub>4</sub> as a light brown oil, which was then stirred with LiNTf<sub>2</sub> (18.94 g, 66 mmol) in H<sub>2</sub>O (20 mL) and the product was extracted with CHCl<sub>3</sub> (3×30 mL) and the solvent was removed *in vacuo* to give a light brown oil (8.5 g, 86%); <sup>1</sup>H NMR (400 MHz, CDCl<sub>3</sub>): δ 6.29 (br, 1H, NH), 3.33 (q, <sup>3</sup>J<sub>HH</sub> = 8.0 Hz, 2H, NCH<sub>2</sub>), 3.11 (s, 12H, NCH<sub>3</sub>), 1.28 (t, <sup>3</sup>J<sub>HH</sub> = 8.0 Hz, 3H, NCH<sub>2</sub>CH<sub>3</sub>); <sup>13</sup>C{<sup>1</sup>H} NMR (100 MHz, CDCl<sub>3</sub>): δ 119.84 (q, <sup>1</sup>J<sub>CF</sub> = 321 Hz, CF<sub>3</sub>), 117.08 (equivalent ring C), 115.48 (unique ring C), 42.40 (NCH<sub>2</sub>), 41.72 (NCH<sub>3</sub>), 15.04 (NCH<sub>2</sub>CH<sub>3</sub>); ESI MS: m/z 168.1495 (M<sup>+</sup>), calcd 168.1495; Anal. calcd for C<sub>11</sub>H<sub>18</sub>N<sub>4</sub>O<sub>4</sub>S<sub>2</sub>F<sub>6</sub>: C, 29.47; H, 4.04; N, 12.49. Found: C, 30.09; H, 4.13; N, 12.26; H<sub>2</sub>O content: 1040 ppm; Cl<sup>-</sup> content: 343 ppm.

**Bis(dimethylamino)ethylmethylaminocyclopropenium bistriflamide, [C<sub>3</sub>(NMe<sub>2</sub>)<sub>2</sub>(NEtMe)]NTf<sub>2</sub> (10a).** Salt **13a** (3.51 g, 8 mmol) was stirred with dry THF at -78 °C and *n*-BuLi (5.38 mL of 1.6 M, 8.8 mmol) was added drop-wise in an inert atmosphere. The reaction mixture was stirred for 30 min and then allowed to warm to room temperature for another 30 min. Me<sub>2</sub>SO<sub>4</sub> (0.98 mL, 10 mmol) was then added

and the solution was stirred for another 30 min. THF was then removed *in vacuo*. The mixture was dissolved in CHCl<sub>3</sub> (50 mL) and LiMeSO<sub>4</sub> was filtered off. Then the CHCl<sub>3</sub> layer was washed with water (3 × 50 mL). The solvent was removed *in vacuo* to give a yellow oil (2.22 g, 77%); <sup>1</sup>H NMR (400 MHz, CDCl<sub>3</sub>): δ 3.39 (q, <sup>3</sup>J<sub>HH</sub> = 7.0 Hz, 2H, NCH<sub>2</sub>), 3.12 (s, 12H, NCH<sub>3</sub>), 3.09 (s, 3H, CH<sub>3</sub>), 1.26 (t, <sup>3</sup>J<sub>HH</sub> = 7.0 Hz, 6H, NCH<sub>2</sub>CH<sub>3</sub>); <sup>13</sup>C{<sup>1</sup>H} NMR (100 MHz, CDCl<sub>3</sub>): δ 119.91 (q, <sup>1</sup>J<sub>CF</sub> = 322 Hz, CF<sub>3</sub>), 117.88 (equivalent ring C), 115.48 (unique ring C), 50.09 (NCH<sub>2</sub>), 42.21 (NCH<sub>3</sub>), 39.24 (NCH<sub>3</sub>), 15.04 (NCH<sub>2</sub>CH<sub>3</sub>); ESI MS: m/z 182.1652 (M<sup>+</sup>), calcd 182.1652; Anal. calcd for C<sub>12</sub>H<sub>20</sub>N<sub>4</sub>O<sub>4</sub>S<sub>2</sub>F<sub>6</sub>: C, 31.17; H, 4.36; N, 12.11. Found: C, 31.56; H, 4.37; N, 12.05; H<sub>2</sub>O content: 880 ppm; Cl<sup>-</sup> content: 125 ppm.

**Bis(dimethylamino)propylaminocyclopropenium bistriflamide, [C<sub>3</sub>(NMe<sub>2</sub>)<sub>2</sub>(NPrH)]NTf<sub>2</sub> (13b).** Salt **7** (3.96 g, 15 mmol) was stirred with NPrH<sub>2</sub> (1.59 mL, 20 mmol) in dry CH<sub>2</sub>Cl<sub>2</sub> (5 mL) for 1 h in an inert atmosphere. CH<sub>2</sub>Cl<sub>2</sub> was removed *in vacuo*. The mixture was washed with dry diethyl ether several times to remove excess amine. The mixture was dissolved in water and the product was extracted with CHCl<sub>3</sub> (3 × 50 mL). The solvent was removed *in vacuo* to give [C<sub>3</sub>(NMe<sub>2</sub>)<sub>2</sub>(NPrH)]MeSO<sub>4</sub> as a light yellow oil, which was then stirred with LiNTf<sub>2</sub> (7.51 g, 27 mmol) in H<sub>2</sub>O (20 mL). The product was extracted with CHCl<sub>3</sub> (3 × 30 mL). The solvent was removed *in vacuo* to give a yellow oil (4.05 g, 92%); <sup>1</sup>H NMR (CDCl<sub>3</sub>, 400 MHz): δ 6.29 (br t, 1H, NH), 3.23 (t, <sup>3</sup>J<sub>HH</sub> = 8.0 Hz, 2H, NCH<sub>2</sub>), 3.11 (s, 12H, NCH<sub>3</sub>), 1.66 (m, 2H, NCH<sub>2</sub>CH<sub>2</sub>), 0.96 (t, <sup>3</sup>J<sub>HH</sub> = 8.0 Hz, 3H, NCH<sub>2</sub>CH<sub>2</sub>CH<sub>3</sub>); <sup>13</sup>C{<sup>1</sup>H} NMR (CDCl<sub>3</sub>, 100 MHz): δ 119.92 (q, <sup>1</sup>J<sub>CF</sub> = 320 Hz, CF<sub>3</sub>), 117.69 (equivalent ring C), 117.47 (unique ring C), 49.30 (NCH<sub>2</sub>), 41.79 (N(CH<sub>3</sub>)<sub>2</sub>), 23.19 (NCH<sub>2</sub>CH<sub>2</sub>), 10.90 (NCH<sub>2</sub>CH<sub>2</sub>CH<sub>3</sub>); ESI MS: m/z 182.1653 (M<sup>+</sup>), calcd 182.1652; Anal. calcd for C<sub>12</sub>H<sub>20</sub>N<sub>4</sub>O<sub>4</sub>S<sub>2</sub>F<sub>6</sub>: C, 31.17; H, 4.36; N, 12.11. Found: C, 31.34; H, 4.47; N, 11.91; H<sub>2</sub>O content: 840 ppm; Cl<sup>-</sup> content: 170 ppm.

**Bis(dimethylamino)propylmethylaminocyclopropenium bistriflamide, [C<sub>3</sub>(NMe<sub>2</sub>)<sub>2</sub>(NPrMe)]NTf<sub>2</sub> (10b).** Salt **13b** (6.5g, 14.06 mmol) was stirred with dry THF at -78 °C and *n*-BuLi (9.66 mL of 1.6 M, 15.5 mmol) was added drop-wise in an inert atmosphere. Reaction mixture was stirred for 3 h and then allowed to warm to ambient temperature. Me<sub>2</sub>SO<sub>4</sub> (1.73 mL, 18.27 mmol) was then added and the solution was stirred for another 30 minutes. THF was then removed *in vacuo*. Mixture was dissolved in CHCl<sub>3</sub> (50 mL) and LiMeSO<sub>4</sub> was filtered off and then wash the CHCl<sub>3</sub> layer with water (3 × 50 mL). The solvent was removed *in vacuo* to give a yellow oil (6 g, 90%); <sup>1</sup>H NMR (CDCl<sub>3</sub>, 400 MHz): δ 3.27 (t, <sup>3</sup>J<sub>HH</sub> = 7.4 Hz, 2H, NCH<sub>2</sub>), 3.11 (s, 12H, NCH<sub>3</sub>), 3.10 (s, 3H, NCH<sub>3</sub>), 1.67 (m, 2H, NCH<sub>2</sub>CH<sub>2</sub>), 0.93 (t, <sup>3</sup>J<sub>HH</sub> = 7.4 Hz, 3H, NCH<sub>2</sub>CH<sub>2</sub>CH<sub>3</sub>); <sup>13</sup>C{<sup>1</sup>H} NMR (CDCl<sub>3</sub>, 100 MHz): δ 119.92 (q, <sup>1</sup>J<sub>CF</sub> = 320 Hz, CF<sub>3</sub>), 117.69 (equivalent ring C), 117.47 (unique ring C), 57.02 (NCH<sub>2</sub>), 42.25 (N(CH<sub>3</sub>)<sub>2</sub>), 40.07 (NCH<sub>3</sub>), 20.94 (NCH<sub>2</sub>CH<sub>2</sub>), 10.84 (NCH<sub>2</sub>CH<sub>2</sub>CH<sub>3</sub>); EI-MS: m/z 196.1813 (M<sup>+</sup>), calcd 196.1808; Anal. calcd for C<sub>13</sub>H<sub>22</sub>N<sub>4</sub>O<sub>4</sub>S<sub>2</sub>F<sub>6</sub>: C, 32.77; H, 4.65; N, 11.76. Found: C, 33.07; H, 4.64; N, 11.71; H<sub>2</sub>O content: 540 ppm; Cl<sup>-</sup> content: 20 ppm.

**Bis(dimethylamino)butylmethylaminocyclopropenium bistriflamide, [C<sub>3</sub>(NMe<sub>2</sub>)<sub>2</sub>(NBuMe)]NTf<sub>2</sub> (10c).** Salt **7** (4.5 g, 17 mmol) was stirred with NBuMeH (2.6 mL, 22 mmol) in dry CH<sub>2</sub>Cl<sub>2</sub> (5 mL) for 2 h in an inert atmosphere. CH<sub>2</sub>Cl<sub>2</sub> was removed *in vacuo*. The mixture was washed with dry diethyl ether several times to remove excess amine. The mixture was dissolved in water and the pH lowered to 1 with HCl(aq) (37%) and the product was extracted with CH<sub>2</sub>Cl<sub>2</sub> (3 × 30 mL). The solvent was removed *in vacuo* to give [C<sub>3</sub>(NMe<sub>2</sub>)<sub>2</sub>(NBuMe)]MeSO<sub>4</sub> as a brown oil which was then stirred with LiNTf<sub>2</sub> (5 g, 18 mmol) in H<sub>2</sub>O (20 mL). The product was extracted with CH<sub>2</sub>Cl<sub>2</sub> (3 × 30 mL) and the solvent was the removed *in vacuo* to give a brown oil (2.8 g, 98%); <sup>1</sup>H NMR (400 MHz, CDCl<sub>3</sub>): δ 3.33 (t, 2H, <sup>3</sup>J<sub>HH</sub> = 7.4 Hz, NCH<sub>2</sub>), 3.12 (s, 12H, NCH<sub>3</sub>), 3.10 s, 3H, NCH<sub>3</sub>), 1.62 (m, 2H, NCH<sub>2</sub>CH<sub>2</sub>), 1.33 (m, 2H, NCH<sub>2</sub>CH<sub>2</sub>CH<sub>2</sub>), 0.93 (t, <sup>3</sup>J<sub>HH</sub> = 7.4 Hz, 3H, CH<sub>2</sub>CH<sub>2</sub>CH<sub>3</sub>); <sup>13</sup>C{<sup>1</sup>H} NMR (100 MHz, CDCl<sub>3</sub>): δ 119.92 (q, <sup>1</sup>J<sub>CF</sub> = 322 Hz, CF<sub>3</sub>),

117.73 (equivalent ring C), 117.47 (unique ring C), 55.29 (NCH<sub>2</sub>), 42.27 (N(CH<sub>3</sub>)<sub>2</sub>), 40.07 (NCH<sub>3</sub>), 29.78 (NCH<sub>2</sub>CH<sub>2</sub>), 19.78 (NCH<sub>2</sub>CH<sub>2</sub>CH<sub>2</sub>), 13.63 (NCH<sub>2</sub>CH<sub>2</sub>CH<sub>2</sub>CH<sub>3</sub>); EI-MS: m/z 210.1968 (M<sup>+</sup>), calcd 210.1965; Anal. calcd for C<sub>14</sub>H<sub>24</sub>N<sub>4</sub>O<sub>4</sub>S<sub>2</sub>F<sub>6</sub>: C, 34.28; H, 4.93; N, 11.42. Found: C, 35.22; H, 5.11; N, 11.23; H<sub>2</sub>O content: 490 ppm; Cl<sup>-</sup> content: 30 ppm.

**Bis(dimethylamino)hexylmethylaminocyclopropenium bistriflamide, [C<sub>3</sub>(NMe<sub>2</sub>)<sub>2</sub>(NHexMe)]NTf<sub>2</sub> (10d).** Salt 7 (4.11 g, 15 mmol) was stirred with NHexMeH (2.88 mL, 19 mmol) in dry CH<sub>2</sub>Cl<sub>2</sub> (10 mL) for 2 h. CH<sub>2</sub>Cl<sub>2</sub> was removed *in vacuo*. The mixture was dissolved in ice cold water and the product was extracted with CHCl<sub>3</sub>:EtOH (2:1, 3 × 30 mL). The solvent was removed *in vacuo* to yield [C<sub>3</sub>(NMe<sub>2</sub>)<sub>2</sub>(NHexMe)]MeSO<sub>4</sub> as a light yellow oil, which was stirred with LiNTf<sub>2</sub> (9.85 g, 34 mmol) in H<sub>2</sub>O (50 mL) for 30 min. The solvent was then removed *in vacuo*. The mixture was dissolved in CHCl<sub>3</sub>:EtOH (2:1, 30 mL) and the product was washed with ice cold water (3 × 30 mL) to remove ammonium salts. Solvent was removed *in vacuo* and the product was dissolved in CHCl<sub>3</sub> (50 mL) and washed with water (3 × 50 mL). The solvent was removed *in vacuo* to yield a light yellow oil (5.62 g, 95%); <sup>1</sup>H NMR (400 MHz, CDCl<sub>3</sub>): δ 3.29 (t, <sup>3</sup>J<sub>HH</sub> = 7.6 Hz, 2H, NCH<sub>2</sub>), 3.12 (s, 12H, NCH<sub>3</sub>), 3.10 (s, 3H, NCH<sub>3</sub>), 1.63 (m, 2H, NCH<sub>2</sub>CH<sub>2</sub>), 1.29 (m, 6H, NCH<sub>2</sub>CH<sub>2</sub>CH<sub>2</sub>CH<sub>2</sub>CH<sub>2</sub>CH<sub>2</sub>), 0.88 (t, <sup>3</sup>J<sub>HH</sub> = 6.8 Hz, 6H, CH<sub>2</sub>CH<sub>3</sub>); <sup>13</sup>C{<sup>1</sup>H} NMR (100 MHz, CDCl<sub>3</sub>): δ 119.91 (q, <sup>1</sup>J<sub>CF</sub> = 347 Hz, CF<sub>3</sub>), 117.73 (equivalent ring C), 117.45 (unique ring C), 55.55 (NCH<sub>2</sub>), 42.25 (NCH<sub>3</sub>), 40.07 (NCH<sub>3</sub>), 31.33 (NCH<sub>2</sub>CH<sub>2</sub>), 27.64 (NCH<sub>2</sub>CH<sub>2</sub>CH<sub>2</sub>), 26.21 (NCH<sub>2</sub>CH<sub>2</sub>CH<sub>2</sub>CH<sub>2</sub>), 22.42 (NCH<sub>2</sub>CH<sub>2</sub>CH<sub>2</sub>CH<sub>2</sub>CH<sub>2</sub>), 13.88 (CH<sub>2</sub>CH<sub>3</sub>); EI-MS: m/z 238.2279 (M<sup>+</sup>), calcd 238.2278; Anal. calcd for C<sub>16</sub>H<sub>28</sub>N<sub>4</sub>O<sub>4</sub>S<sub>2</sub>F<sub>6</sub>: C, 37.06; H, 5.44; N, 10.81. Found: C, 37.28; H, 5.57; N, 10.94; H<sub>2</sub>O content: 460 ppm; Cl<sup>-</sup> content: 80 ppm.

Table 1S. <sup>1</sup>H-NMR chemical shift ranges in CDCl<sub>3</sub>.

| Alkyl group                              | H <sub>α</sub> | H <sub>β</sub> | H <sub>γ to ω-1</sub> | H <sub>ω</sub> |
|------------------------------------------|----------------|----------------|-----------------------|----------------|
| Me                                       | 3.10–3.20      |                |                       |                |
| Et                                       | 3.35–3.40      |                |                       | 1.22–1.27      |
| C <sub>n</sub> H <sub>2n+1</sub> (n > 2) | 3.25–3.35      | 1.55–1.70      | 1.20–1.35             | 0.85–0.95      |

Table 2S. <sup>13</sup>C-NMR chemical shift ranges in CDCl<sub>3</sub>.

| Alkyl group                              | C <sub>α</sub> | C <sub>β</sub> | C <sub>γ to ω-2</sub> | C <sub>ω-1</sub> | C <sub>ω</sub> |
|------------------------------------------|----------------|----------------|-----------------------|------------------|----------------|
| Me                                       | 39.0–42.3      |                |                       |                  |                |
| Et                                       | 47.1–50.1      |                |                       |                  | 12.9–15.0      |
| Pr                                       | 52.2–57.0      | 20.9–21.9      |                       |                  | 10.5–10.9      |
| C <sub>n</sub> H <sub>2n+1</sub> (n > 3) | 52.9–55.6      | 28.5–31.8      | 26.2–29.5             | 19.6–22.7        | 13.5–14.2      |



Table 3S. Density data for peralkyltriaminocyclopropenium bistriflamide ionic liquids

| Compound   | Density (g cm <sup>-3</sup> ) |       |       |       |       |       |       |       |
|------------|-------------------------------|-------|-------|-------|-------|-------|-------|-------|
|            | 20 °C                         | 30 °C | 40 °C | 50 °C | 60 °C | 70 °C | 80 °C | 90 °C |
| <b>3b</b>  | 1.277                         | 1.269 | 1.260 | 1.251 | 1.243 | 1.234 | 1.226 | 1.217 |
| <b>3c</b>  | 1.196                         | 1.188 | 1.179 | 1.171 | 1.163 | 1.155 | 1.147 | 1.139 |
| <b>3d</b>  | 1.134                         | 1.127 | 1.119 | 1.111 | 1.103 | 1.095 | 1.088 | 1.080 |
| <b>3e</b>  | 1.086                         | 1.079 | 1.072 | 1.064 | 1.057 | 1.050 | 1.043 | 1.036 |
| <b>3f</b>  | 1.059                         | 1.051 | 1.044 | 1.037 | 1.030 | 1.022 | 1.015 | 1.008 |
| <b>3g</b>  | 0.991                         | 0.984 | 0.977 | 0.970 | 0.964 | 0.957 | 0.950 | 0.943 |
| <b>4a</b>  | 1.333                         | 1.324 | 1.315 | 1.306 | 1.297 | 1.288 | 1.279 | 1.270 |
| <b>4b</b>  | 1.224                         | 1.216 | 1.207 | 1.199 | 1.191 | 1.183 | 1.174 | 1.166 |
| <b>9b</b>  | –                             | –     | –     | 1.287 | 1.279 | 1.271 | 1.262 | 1.254 |
| <b>9c</b>  | 1.272                         | 1.261 | 1.253 | 1.244 | 1.236 | 1.228 | 1.219 | 1.210 |
| <b>9d</b>  | 1.209                         | 1.200 | 1.192 | 1.184 | 1.176 | 1.168 | 1.159 | 1.151 |
| <b>10b</b> | 1.356                         | 1.346 | 1.337 | 1.328 | 1.319 | 1.309 | 1.301 | 1.292 |
| <b>10c</b> | 1.331                         | 1.321 | 1.313 | 1.303 | 1.294 | 1.285 | 1.276 | 1.266 |
| <b>10d</b> | 1.292                         | 1.283 | 1.274 | 1.266 | 1.256 | 1.248 | 1.239 | 1.231 |
| <b>11a</b> | 1.308                         | 1.299 | 1.291 | 1.282 | 1.273 | 1.264 | 1.256 | 1.247 |
| <b>11b</b> | 1.216                         | 1.208 | 1.200 | 1.191 | 1.183 | 1.175 | 1.167 | 1.159 |
| <b>11c</b> | 1.171                         | 1.163 | 1.155 | 1.147 | 1.139 | 1.131 | 1.123 | 1.115 |
| <b>12a</b> | 1.260                         | 1.251 | 1.243 | 1.235 | 1.226 | 1.218 | 1.209 | 1.201 |
| <b>12b</b> | 1.228                         | 1.220 | 1.211 | 1.203 | 1.195 | 1.187 | 1.178 | 1.170 |

Table 4S. Density fitting parameters for peralkyltriaminocyclopropenium bistriflamide ionic liquids

| Compound   | $-b \times 10^{-4}$ | a      | $\alpha_p$<br>$-c \times 10^{-3}$ | d       |
|------------|---------------------|--------|-----------------------------------|---------|
| <b>3b</b>  | 8.576               | 1.5284 | 0.68773                           | 0.44624 |
| <b>3c</b>  | 8.126               | 1.4337 | 0.69621                           | 0.38282 |
| <b>3d</b>  | 7.755               | 1.3615 | 0.70058                           | 0.33140 |
| <b>3e</b>  | 7.161               | 1.2959 | 0.67668                           | 0.28092 |
| <b>3f</b>  | 7.263               | 1.2715 | 0.70295                           | 0.26319 |
| <b>3g</b>  | 6.812               | 1.1905 | 0.70440                           | 0.19745 |
| <b>4a</b>  | 9.000               | 1.5967 | 0.69161                           | 0.49024 |
| <b>4b</b>  | 8.221               | 1.4646 | 0.68803                           | 0.40367 |
| <b>9b</b>  | 8.300               | 1.5304 | 0.65332                           | 0.46353 |
| <b>9c</b>  | 8.655               | 1.5243 | 0.69771                           | 0.44413 |
| <b>9d</b>  | 8.246               | 1.4497 | 0.69733                           | 0.39400 |
| <b>10b</b> | 9.083               | 1.6226 | 0.68899                           | 0.50614 |
| <b>10c</b> | 9.210               | 1.6005 | 0.70877                           | 0.49365 |
| <b>10d</b> | 8.750               | 1.5481 | 0.69384                           | 0.45945 |
| <b>11a</b> | 8.709               | 1.5633 | 0.68175                           | 0.46846 |
| <b>11b</b> | 8.193               | 1.4562 | 0.69007                           | 0.39800 |
| <b>11c</b> | 7.881               | 1.4014 | 0.68959                           | 0.35965 |
| <b>12a</b> | 8.403               | 1.5061 | 0.68300                           | 0.43126 |
| <b>12b</b> | 8.204               | 1.4681 | 0.68431                           | 0.40580 |

Table 5S. Molar volumes (mL mol<sup>-1</sup>) for TDAC bistriflamide ILs

| Compound   | MW      | 293 K   | 303 K   | 313 K   | 323 K   | 333 K   | 343 K   | 353 K   | 363 K   |
|------------|---------|---------|---------|---------|---------|---------|---------|---------|---------|
| <b>3b</b>  | 532.56  | 416.97  | 419.82  | 422.71  | 425.62  | 428.56  | 431.53  | 434.51  | 437.53  |
| <b>3c</b>  | 616.72  | 515.75  | 519.33  | 522.95  | 526.60  | 530.28  | 533.99  | 537.73  | 541.50  |
| <b>3d</b>  | 700.89  | 617.90  | 622.18  | 626.51  | 630.91  | 635.35  | 639.83  | 644.37  | 648.94  |
| <b>3e</b>  | 785.05  | 722.88  | 727.57  | 732.32  | 737.83  | 742.71  | 747.66  | 752.68  | 757.77  |
| <b>3f</b>  | 869.21  | 820.92  | 826.67  | 832.45  | 838.30  | 844.21  | 850.19  | 856.23  | 862.34  |
| <b>3g</b>  | 1205.86 | 1216.65 | 1225.33 | 1233.93 | 1242.66 | 1251.42 | 1260.26 | 1269.19 | 1278.20 |
| <b>4a</b>  | 490.48  | 367.95  | 370.45  | 372.99  | 375.56  | 378.16  | 380.81  | 383.49  | 386.20  |
| <b>4b</b>  | 574.64  | 469.52  | 472.74  | 476.00  | 479.28  | 482.59  | 485.93  | 489.29  | 492.68  |
| <b>9b</b>  | 504.51  | –       | –       | –       | 392.00  | 394.45  | 396.94  | 399.77  | 402.32  |
| <b>9c</b>  | 532.56  | 418.68  | 422.33  | 425.03  | 428.10  | 430.87  | 433.68  | 436.88  | 440.13  |
| <b>9d</b>  | 588.67  | 486.91  | 490.56  | 493.85  | 497.19  | 500.57  | 504.00  | 507.91  | 511.44  |
| <b>10b</b> | 476.45  | 351.37  | 353.98  | 356.36  | 358.77  | 361.22  | 363.98  | 366.22  | 368.77  |
| <b>10c</b> | 490.48  | 368.50  | 371.29  | 373.56  | 376.42  | 379.04  | 381.70  | 384.39  | 387.42  |
| <b>10d</b> | 518.53  | 401.34  | 404.16  | 407.01  | 409.58  | 412.85  | 415.49  | 418.51  | 421.23  |
| <b>11a</b> | 504.51  | 385.64  | 388.26  | 390.91  | 393.59  | 396.28  | 398.99  | 401.73  | 404.49  |
| <b>11b</b> | 588.67  | 484.02  | 487.33  | 490.69  | 494.08  | 497.51  | 500.96  | 504.45  | 507.96  |
| <b>11c</b> | 644.78  | 550.82  | 554.57  | 558.38  | 562.23  | 566.13  | 570.06  | 574.04  | 578.05  |
| <b>12a</b> | 546.59  | 433.81  | 436.76  | 439.74  | 442.75  | 445.78  | 448.85  | 451.93  | 455.05  |
| <b>12b</b> | 574.64  | 468.01  | 471.20  | 474.43  | 477.68  | 480.96  | 484.27  | 487.61  | 490.97  |

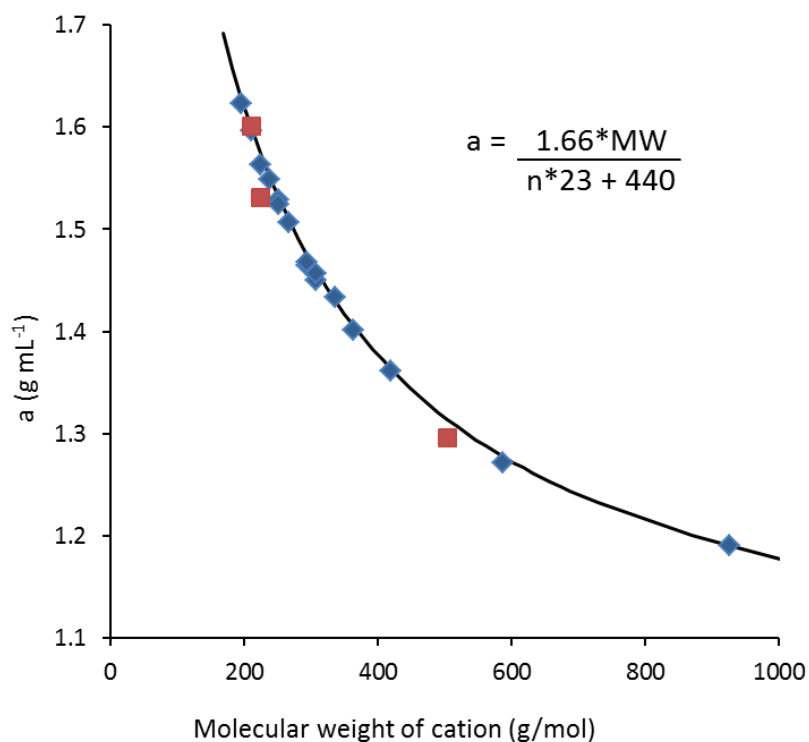

**Fig. 1S.** Density parameter *a* versus cation molecular weight for TDAC bistriflamide ILs. Salts **3e**, **9b** and **10c** are indicated by red squares.

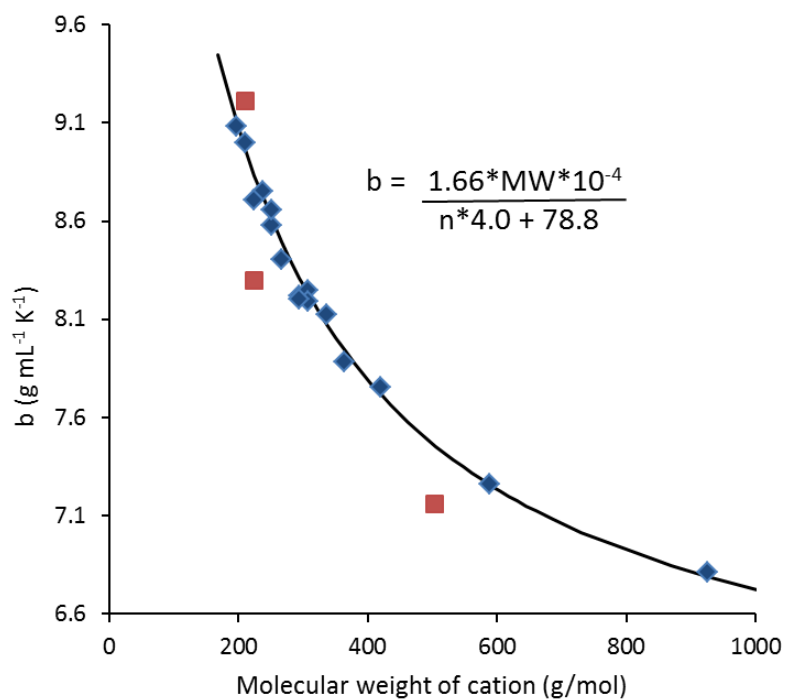

**Fig. 2S.** Density parameter  $b$  versus cation molecular weight for TDAC bistriflamide ILs. Salts **3e**, **9b** and **10c** are indicated by red squares.

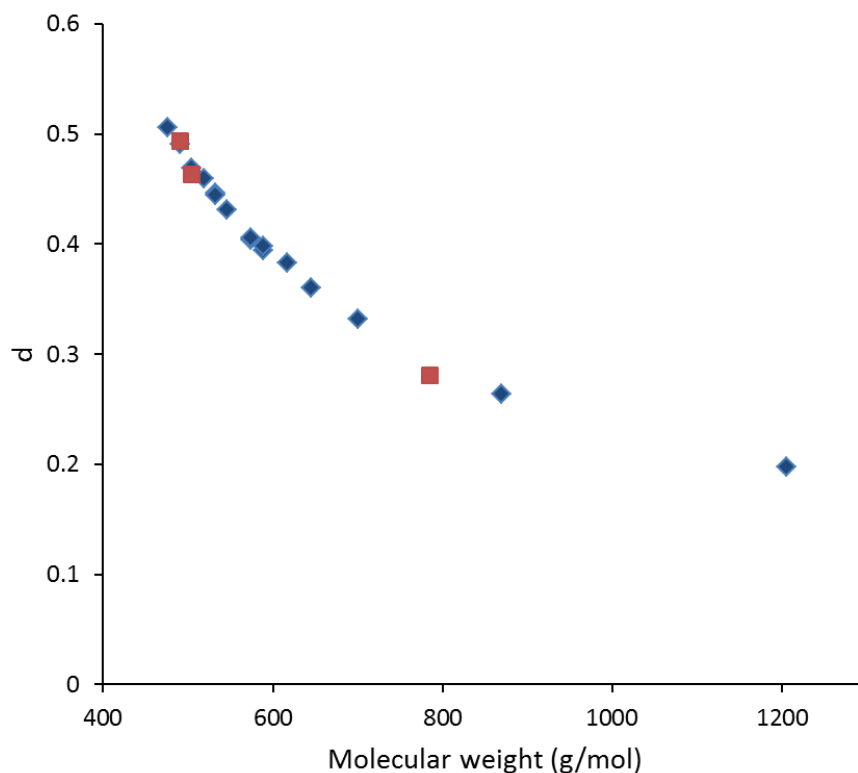

**Fig. 3S.**  $d$  (the intercept of  $\ln(\rho)$  versus  $T$  plots) versus cation molecular weight for TDAC bistriflamide ILs. Salts **3e**, **9b** and **10c** are indicated by red squares.

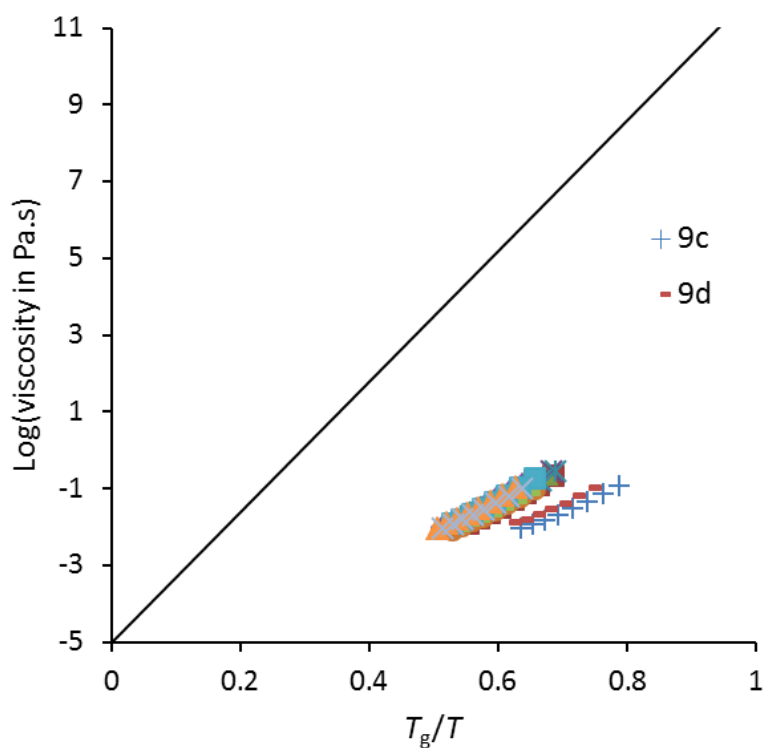

**Fig. 4S.** A fragility plot for the salts with observed glass transition temperatures.

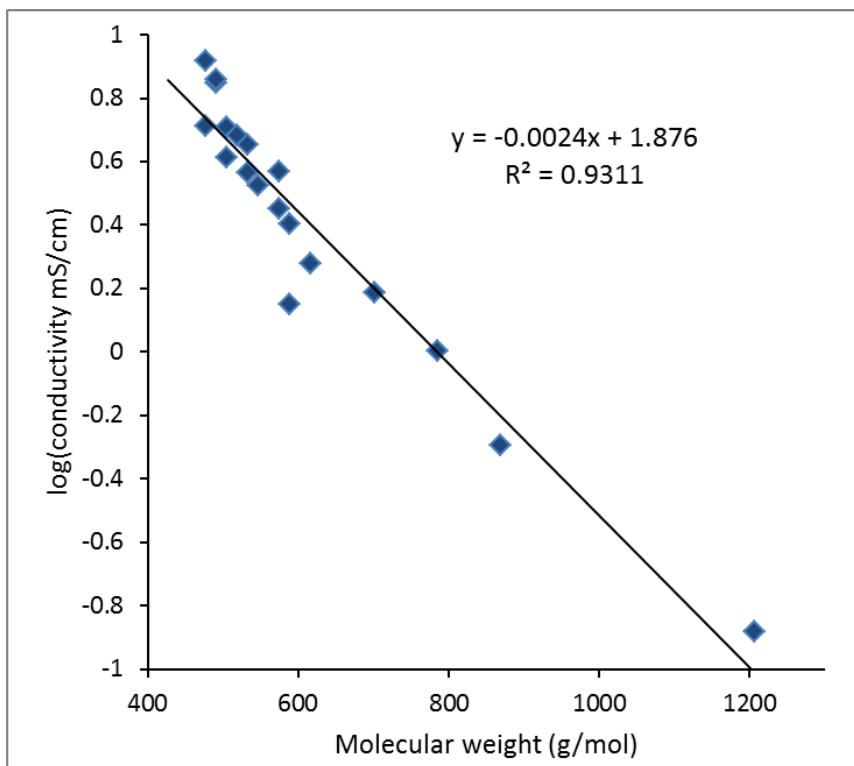

**Fig. 5S.** Log(conductivity) versus molecular weight for TDAC bistriflamide ILs.

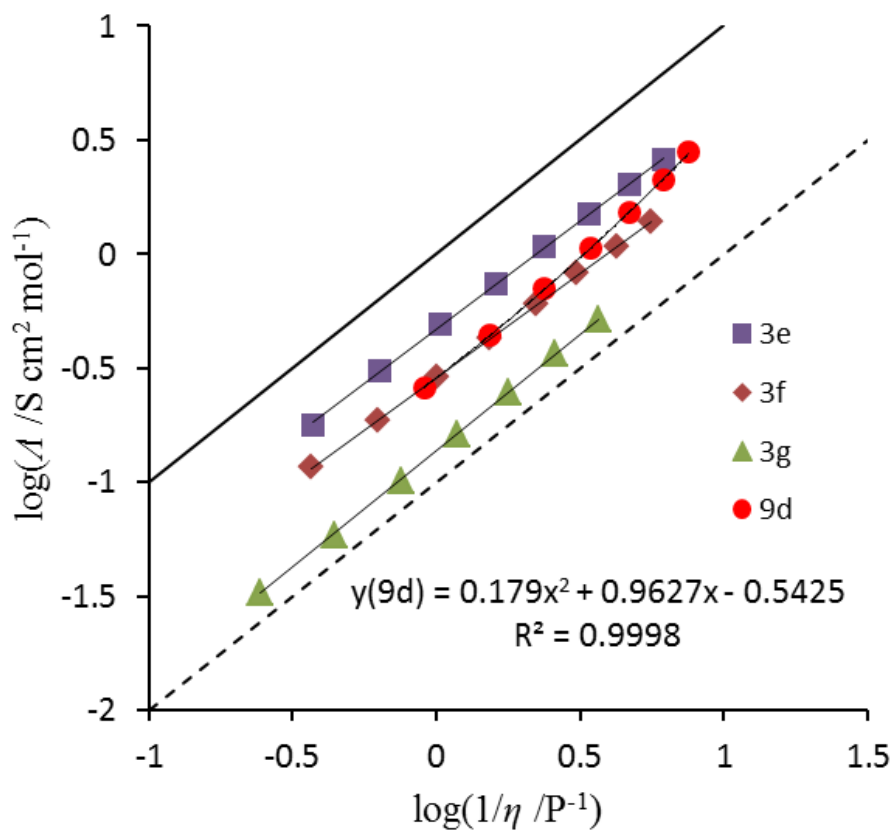

Fig. 6S. Walden plot for 3e-g and 9d.

## The Adjusted Walden Plot

MacFarlane developed an adjusted Walden plot to take into account the role of the ion sizes  $r^+$  and  $r^-$  (Eq 1S).<sup>3</sup> To make this adjusted plot (Fig 5S), we used the volume of 248 Å<sup>3</sup> for bistriflamide for a radius of 3.90 Å at 20 °C. MacFarlane calculated a radius of 3.72 Å using HF/aug-cc-pVTZ, which is considered to be an underestimation of the hydrodynamic radius,<sup>3</sup> so we have used 3.90 Å. Interestingly, 3.72 Å agrees quite well with a radius of 3.68 Å estimated using the volume of **3a** at 0 K (440 Å<sup>3</sup>, Fig. 1S). By difference and using the equation:  $V_{298\text{ K}} = n \cdot 27.7 + 528$ , derived from Fig. 5, we calculated the effective hydrodynamic radii of the various cations (given in Table 2). Although we could also adjust for the change in  $r^+$  and  $r^-$  with temperature, we have not done so as the correction would be minimal over the experimental temperature range.

---

$$\eta\Lambda = \text{constant} \left( \frac{1}{r^+} + \frac{1}{r^-} \right) \quad \text{Eq. 1S}$$

---

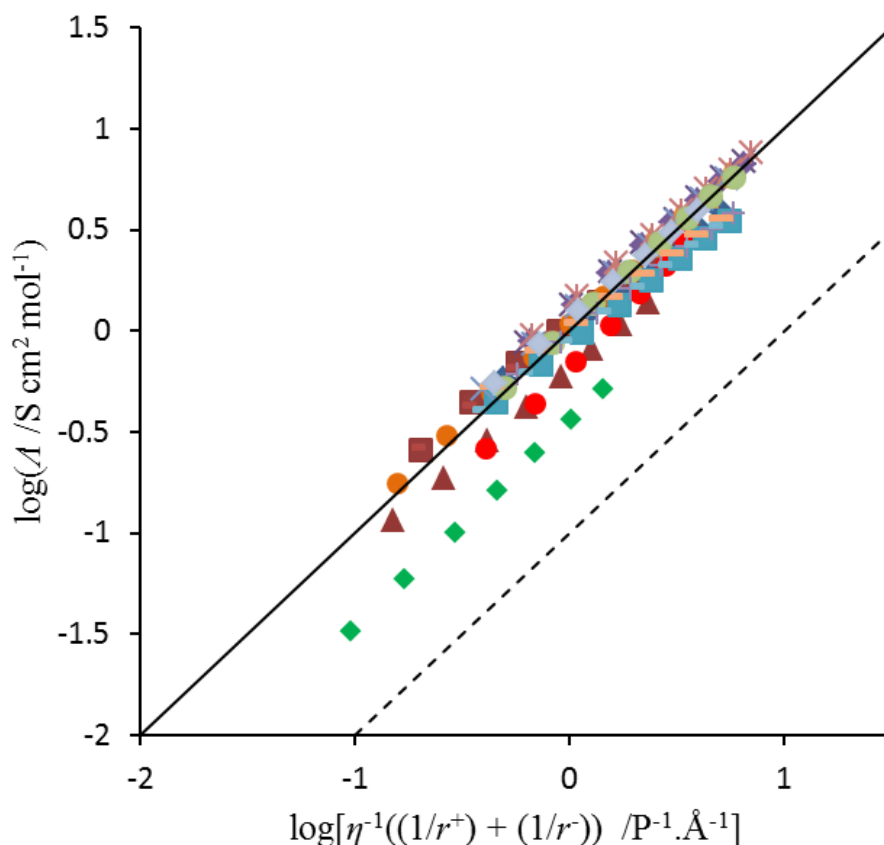

**Fig. 7S.** Adjusted Walden plot for TDAC bistriflamide salts.

---

Table 6S. Viscosity data for hexaalkyltriaminocyclopropenium bistriflamide ionic liquids

| Compound   | Viscosity/cP |       |       |       |       |       |       |       |
|------------|--------------|-------|-------|-------|-------|-------|-------|-------|
|            | 20 °C        | 30 °C | 40 °C | 50 °C | 60 °C | 70 °C | 80 °C | 90 °C |
| <b>3b</b>  | 94.7         | 60.5  | 40    | 27.5  | 19.6  | 15    | 11.5  | 9.04  |
| <b>3c</b>  | 219.7        | 127.1 | 78.3  | 50.1  | 32.3  | 22.6  | 16.6  | 12.6  |
| <b>3d</b>  | 230.4        | 134.3 | 83.6  | 55.2  | 38.3  | 26.9  | 19.2  | –     |
| <b>3e</b>  | 268.7        | 157.8 | 97.1  | 62.1  | 41.9  | 29.3  | 21.3  | 16.1  |
| <b>3f</b>  | 273.0        | 159.0 | 99.6  | 65.3  | 44.9  | 32.4  | 23.6  | 17.8  |
| <b>3g</b>  | 407.6        | 226.8 | 132.3 | 84.6  | 56    | 38.4  | 27.2  | 20.0  |
| <b>4a</b>  | 72.5         | 45.8  | 31.3  | 22.0  | 16.2  | 12.2  | 9.45  | 7.46  |
| <b>4b</b>  | 101          | 61.9  | 39.8  | 26.8  | 19    | 13.9  | 10.6  | 8.21  |
| <b>9a</b>  | –            | –     | –     | 25.1  | 18.2  | 13.5  | 10.5  | 8.17  |
| <b>9b</b>  | –            | –     | –     | 28.9  | 19.8  | 14.7  | 11.0  | 8.63  |
| <b>9c</b>  | 117.5        | 69    | 43.3  | 28.6  | 19.8  | 14.6  | 11.2  | 8.68  |
| <b>9d</b>  | –            | 110.3 | 65.4  | 42.3  | 29.0  | 21.3  | 16.1  | 13.2  |
| <b>10a</b> | –            | –     | –     | –     | –     | 13.6  | 10.6  | 8.58  |
| <b>10b</b> | 72.5         | 45.2  | 29.6  | 20.0  | 14.6  | 11.2  | 8.68  | 6.90  |
| <b>10c</b> | 76.1         | 47.4  | 31.1  | 21.9  | 15.4  | 12.2  | 9.3   | 7.41  |
| <b>10d</b> | 94.0         | 56.4  | 36.4  | 24.7  | 18.0  | 13.4  | 10.3  | 8.07  |
| <b>11a</b> | 83.6         | 52.4  | 35.2  | 24.7  | 17.9  | 13.4  | 10.3  | 8.15  |
| <b>11b</b> | 125.7        | 76.4  | 49.9  | 32.7  | 23.1  | 17.2  | 13.0  | 9.91  |
| <b>11c</b> | 182.1        | 107.8 | 67.8  | 44.2  | 30.2  | 21.7  | 15.8  | 12.0  |
| <b>12a</b> | 106.2        | 66.4  | 43.3  | 29.7  | 21.1  | 15.5  | 11.9  | 9.12  |
| <b>12b</b> | 101.8        | 62.8  | 41.4  | 28.3  | 20.3  | 15.2  | 11.6  | 9.07  |

Table 7S. Viscosity fit parameters for hexaalkyltriaminocyclopropenium bistriflamide ionic liquids.

| Compound   | Parameter |      |       |      |          |       |       |          |
|------------|-----------|------|-------|------|----------|-------|-------|----------|
|            | $\eta_0$  | $B$  | $T_0$ | $D$  | $\delta$ | $A$   | $E_a$ | $\delta$ |
| <b>3b</b>  | 0.053     | 1142 | 140   | 8.2  | 0.4      | 0.294 | 30.9  | 2.1      |
| <b>3c</b>  | 0.011     | 1695 | 122   | 13.9 | 1.2      | 0.037 | 38.0  | 4.9      |
| <b>3d</b>  | 0.037     | 1332 | 140   | 9.5  | 1.3      | 0.083 | 36.0  | 6.9      |
| <b>3e</b>  | 0.019     | 1592 | 127   | 12.5 | 1.0      | 0.065 | 37.1  | 5.8      |
| <b>3f</b>  | 0.058     | 1245 | 146   | 8.5  | 0.4      | 0.124 | 35.5  | 7.4      |
| <b>3g</b>  | 0.032     | 1420 | 143   | 9.9  | 0.8      | 0.037 | 39.4  | 11.7     |
| <b>4a</b>  | 0.065     | 1031 | 146   | 7.1  | 0.2      | 0.412 | 29.3  | 1.8      |
| <b>4b</b>  | 0.042     | 1142 | 146   | 7.8  | 0.2      | 0.132 | 33.0  | 2.6      |
| <b>9a</b>  | 0.039     | 1233 | 132   | 9.3  | 0.1      | 0.146 | 32.7  | 0.2      |
| <b>9b</b>  | 0.203     | 617  | 198   | 3.1  | 0.1      | 0.420 | 29.9  | 0.5      |
| <b>9c</b>  | 0.077     | 923  | 167   | 5.5  | 0.4      | 0.071 | 34.8  | 4.1      |
| <b>9d</b>  | 0.415     | 536  | 207   | 2.6  | 0.3      | 0.114 | 34.6  | 4.5      |
| <b>10b</b> | 0.098     | 834  | 167   | 5.0  | 0.4      | 0.189 | 31.3  | 4.0      |
| <b>10c</b> | 0.107     | 834  | 166   | 5.0  | 0.2      | 0.250 | 30.7  | 2.4      |
| <b>10d</b> | 0.124     | 795  | 173   | 4.6  | 0.2      | 0.159 | 32.3  | 2.1      |
| <b>11a</b> | 0.065     | 1043 | 147   | 7.1  | 0.4      | 0.337 | 30.2  | 3.2      |
| <b>11b</b> | 0.045     | 1180 | 144   | 8.2  | 0.3      | 0.146 | 33.2  | 4.2      |
| <b>11c</b> | 0.023     | 1436 | 133   | 10.8 | 0.2      | 0.082 | 35.5  | 2.3      |
| <b>12a</b> | 0.033     | 1294 | 133   | 9.7  | 0.1      | 0.213 | 31.9  | 2.7      |
| <b>12b</b> | 0.069     | 1032 | 152   | 6.8  | 0.1      | 0.295 | 30.9  | 2.5      |

Table 8S. Conductivity data for hexaalkyltriaminocyclopropenium bistriflamide ionic liquids.

| Compound   | Conductivity/mS cm <sup>-1</sup> |       |       |       |       |       |       |       |
|------------|----------------------------------|-------|-------|-------|-------|-------|-------|-------|
|            | 20 °C                            | 30 °C | 40 °C | 50 °C | 60 °C | 70 °C | 80 °C | 90 °C |
| <b>3b</b>  | 1.387                            | 1.983 | 2.755 | 3.681 | 4.752 | 5.972 | 7.349 | 8.857 |
| <b>3c</b>  | 0.498                            | 0.862 | 1.323 | 1.904 | 2.629 | 3.491 | 4.498 | 5.642 |
| <b>3d</b>  | 0.428                            | 0.694 | 1.057 | 1.535 | 2.144 | 2.915 | 3.819 | 4.870 |
| <b>3e</b>  | 0.245                            | 0.420 | 0.670 | 1.011 | 1.453 | 2.000 | 2.670 | 3.450 |
| <b>3f</b>  | 0.141                            | 0.226 | 0.349 | 0.508 | 0.710 | 0.965 | 1.257 | 1.602 |
| <b>3g</b>  | 0.027                            | 0.048 | 0.082 | 0.131 | 0.198 | 0.288 | 0.404 | –     |
| <b>4a</b>  | 2.42                             | 3.62  | 5.19  | 7.05  | 9.18  | 11.57 | 14.26 | 17.19 |
| <b>4b</b>  | 0.939                            | 1.451 | 2.074 | 2.825 | 3.711 | 4.723 | 5.869 | 7.124 |
| <b>9a</b>  | –                                | –     | –     | 5.15  | 7.13  | 9.43  | 12.21 | 15.40 |
| <b>9b</b>  | –                                | –     | 3.44  | 5.09  | 7.01  | 9.20  | 11.64 | 14.53 |
| <b>9c</b>  | 1.23                             | 2.03  | 3.12  | 4.50  | 6.16  | 8.10  | 10.29 | 12.80 |
| <b>9d</b>  | 0.29                             | 0.53  | 0.89  | 1.41  | 2.12  | 3.03  | 4.15  | 5.52  |
| <b>10b</b> | 2.71                             | 4.17  | 6.07  | 8.30  | 10.83 | 13.76 | 16.95 | 20.6  |
| <b>10c</b> | 2.36                             | 3.61  | 5.23  | 7.23  | 9.46  | 12.01 | 14.85 | 17.94 |
| <b>10d</b> | 1.31                             | 2.17  | 3.34  | 4.83  | 6.63  | 8.73  | 11.09 | 13.74 |
| <b>11a</b> | 1.572                            | 2.250 | 3.101 | 4.106 | 5.264 | 6.547 | 7.933 | 9.374 |
| <b>11b</b> | 0.850                            | 1.288 | 1.847 | 2.532 | 3.346 | 4.284 | 5.348 | 6.522 |
| <b>12a</b> | 1.225                            | 1.839 | 2.512 | 3.346 | 4.322 | 5.413 | 6.630 | 7.964 |
| <b>12b</b> | 1.176                            | 1.818 | 2.650 | 3.690 | 4.940 | 6.380 | 8.030 | –     |

Table 9S. Conductivity fit parameters for hexaalkyltriaminocyclopropenium bistriflamide ionic liquids.

| Compound   | Parameter         |      |       |     |          |        |       |          |
|------------|-------------------|------|-------|-----|----------|--------|-------|----------|
|            | $\sigma_{\infty}$ | $B$  | $T_0$ | $D$ | $\delta$ | $A$    | $E_a$ | $\delta$ |
| <b>3b</b>  | 394               | 807  | 150   | 5.4 | 0.0059   | 13871  | 22157 | 0.107    |
| <b>3c</b>  | 296               | 736  | 177   | 4.2 | 0.0083   | 48148  | 27264 | 0.093    |
| <b>3d</b>  | 657               | 1032 | 153   | 6.8 | 0.0058   | 63944  | 28577 | 0.057    |
| <b>3e</b>  | 436               | 957  | 165   | 5.8 | 0.0016   | 82653  | 30387 | 0.047    |
| <b>3f</b>  | 185               | 978  | 157   | 6.2 | 0.0020   | 20287  | 28466 | 0.020    |
| <b>3g</b>  | 263               | 1312 | 151   | 8.7 | 0.0004   | 95007  | 36273 | 0.004    |
| <b>4a</b>  | 458               | 614  | 176   | 3.5 | 0.0153   | 33000  | 22759 | 0.283    |
| <b>4b</b>  | 244               | 682  | 170   | 4.0 | 0.0064   | 17143  | 23444 | 0.110    |
| <b>9a</b>  | 1259              | 885  | 162   | 5.5 | 0.0180   | 88860  | 26121 | 0.096    |
| <b>9b</b>  | 417               | 564  | 195   | 2.9 | 0.0418   | 70806  | 25592 | 0.202    |
| <b>9c</b>  | 468               | 640  | 185   | 3.5 | 0.0114   | 83026  | 26431 | 0.234    |
| <b>9d</b>  | 950               | 985  | 172   | 5.7 | 0.0043   | 361752 | 33427 | 0.076    |
| <b>10b</b> | 545               | 602  | 179   | 3.4 | 0.0381   | 46656  | 23260 | 0.354    |
| <b>10c</b> | 436               | 574  | 183   | 3.1 | 0.0172   | 41467  | 23314 | 0.324    |
| <b>10d</b> | 445               | 603  | 190   | 3.2 | 0.0070   | 89648  | 26443 | 0.265    |
| <b>11a</b> | 204               | 583  | 173   | 3.4 | 0.0162   | 10297  | 21067 | 0.153    |
| <b>11b</b> | 284               | 753  | 163   | 4.6 | 0.0011   | 17994  | 23860 | 0.093    |
| <b>12a</b> | 267               | 711  | 161   | 4.4 | 0.0117   | 11542  | 21919 | 0.109    |
| <b>12b</b> | 457               | 752  | 167   | 4.5 | 0.0031   | 52945  | 25766 | 0.109    |



Table 10S. Water contents of water-saturated ionic liquids at 298 K.

| Ionic liquid          | MW (g/mol) | Water content<br>(ppm/1000) | $X_w^b$ | reference |
|-----------------------|------------|-----------------------------|---------|-----------|
| N <sub>2,1,1,3</sub>  | 397        | 14.8                        |         | 6         |
| N <sub>6,2,2,2</sub>  | 467        | 7.45                        |         | 4         |
| N <sub>8,2,2,2</sub>  | 495        | 6.07                        |         | 4         |
| N <sub>12,2,2,2</sub> | 551        | 4.64                        |         | 4         |
| C3mpyr                | 408        | 13.2                        | 0.233   | 13        |
| C3mpyr                | 408        | 13.2                        |         | 14        |
| C4mpyr                | 422        | 11.3                        | 0.211   | 13        |
| C4mpyr                | 422        | 12.2                        |         | 6         |
| C4mpyr                | 422        | 11.7                        |         | 14        |
| C6mpyr                | 450        | 10.7                        |         | 6         |
| C8mpyr                | 478        | 8.4                         |         | 14        |
| C3mpip                | 422        | 11.3                        | 0.212   | 13        |
| C3mpip                | 422        | 11.7                        |         | 14        |
| C4mpip                | 436        | 10.1                        |         | 14        |
| C8mpip                | 492        | 6.6                         |         | 14        |
| C2py                  | 388        | 21.1                        |         | 11        |
| C4py                  | 416        | 14.6                        |         | 11        |
| C4py                  | 416        | 14.4                        | 0.252   | 5         |
| C6py                  | 444        | 11.6                        | 0.225   | 5         |
| C8py                  | 472        | 9.3                         | 0.197   | 5         |
| C8py                  | 472        | 8.6                         |         | 15        |
| C2mpy                 | 402        | 17                          |         | 11        |
| C3mpy                 | 416        | 13.2                        | 0.236   | 5         |
| C3mpy                 | 416        | 13.2                        | 0.236   | 4         |
| C4mpy                 | 430        | 11.2                        | 0.213   | 5         |
| C4mpy                 | 430        | 13.5                        | 0.247   | 5         |
| C4mpy                 | 430        | 11.8                        |         | 11        |
| C8mpy                 | 486        | 7.8                         |         | 15        |
| C8mpy                 | 486        | 7.3                         |         | 15        |
| P <sub>14,6,6,6</sub> | 764        | 2.2                         |         | 9         |
| C2mim                 | 391        | 19.8                        |         | 7         |
| C2mim                 | 391        | 19.2                        | 0.298   | 12        |
| C3mim                 | 405        | 16.3                        | 0.272   | 12        |
| C4mim                 | 419        | 14.6                        | 0.257   | 12        |
| C4mim                 | 419        | 10.3 <sup>a</sup>           |         | 10        |
| C4mim                 | 419        | 3.28 <sup>a</sup>           |         | 8         |
| C4mim                 | 419        | 19.9 <sup>a</sup>           |         | 7         |
| C5mim                 | 433        | 11.7                        | 0.221   | 12        |
| C6mim                 | 447        | 10.5                        |         | 12        |
| C6mim                 | 447        | 12.1                        |         | 6         |
| C7mim                 | 461        | 9.5                         |         | 12        |
| C8mim                 | 475        | 8.6                         |         | 12        |

<sup>a</sup> Data not used. <sup>b</sup> Mole fraction of water (when provided in reference).

## X-ray crystallography

Single crystals of **3a** and **3c** formed in the neat liquid. A suitable crystal of each was selected and mounted on a SuperNova, Dual, Cu at zero, Atlas diffractometer. Using Olex2,<sup>16</sup> the structure was solved with the XS structure solution program<sup>17</sup> using Direct Methods and refined with the XL refinement package<sup>17</sup> using Least Squares minimisation.

Table 11S. Crystallographic data for **3a** and **3c**.

|                                                     | <b>3a</b>                                                                                   | <b>3c</b>                                                                                   |
|-----------------------------------------------------|---------------------------------------------------------------------------------------------|---------------------------------------------------------------------------------------------|
| Empirical formula                                   | C <sub>11</sub> H <sub>18</sub> N <sub>4</sub> O <sub>4</sub> F <sub>6</sub> S <sub>2</sub> | C <sub>23</sub> H <sub>42</sub> N <sub>4</sub> O <sub>4</sub> F <sub>6</sub> S <sub>2</sub> |
| Formula weight                                      | 448.41                                                                                      | 616.73                                                                                      |
| Temperature (K)                                     | 113(2)                                                                                      | 296(2)                                                                                      |
| Crystal system                                      | Monoclinic                                                                                  | Monoclinic                                                                                  |
| Space group                                         | P2 <sub>1</sub> /c                                                                          | I <sub>2</sub>                                                                              |
| <i>a</i> (Å)                                        | 20.8556(5)                                                                                  | 19.2495(4)                                                                                  |
| <i>b</i> (Å)                                        | 14.7302(4)                                                                                  | 10.09683(17)                                                                                |
| <i>c</i> (Å)                                        | 18.6770(5)                                                                                  | 34.2770(7)                                                                                  |
| $\alpha$ (°)                                        | 90                                                                                          | 90                                                                                          |
| $\beta$ (°)                                         | 101.824(2)                                                                                  | 105.887(2)                                                                                  |
| $\gamma$ (°)                                        | 90                                                                                          | 90                                                                                          |
| Volume (Å <sup>3</sup> )                            | 5616.0(3)                                                                                   | 6407.6(2)                                                                                   |
| <i>Z</i>                                            | 12                                                                                          | 8                                                                                           |
| Density (calculated) (mg mm <sup>-3</sup> )         | 1.591                                                                                       | 1.279                                                                                       |
| Absorption coefficient (mm <sup>-1</sup> )          | 0.363                                                                                       | 2.114                                                                                       |
| <i>F</i> (000)                                      | 2676                                                                                        | 2608.0                                                                                      |
| Crystal size (mm <sup>3</sup> )                     | 0.74 × 0.51 × 0.08                                                                          | 0.335 × 0.274 × 0.185                                                                       |
| 2 Theta range for data collection                   | 3.4 to 50.1°                                                                                | 5.362 to 150.946                                                                            |
| Index ranges                                        | -24 ≤ <i>h</i> ≤ 24<br>-17 ≤ <i>k</i> ≤ 17<br>-22 ≤ <i>l</i> ≤ 22                           | -19 ≤ <i>h</i> ≤ 24<br>-12 ≤ <i>k</i> ≤ 12<br>-42 ≤ <i>l</i> ≤ 34                           |
| Reflections collected                               | 100470                                                                                      | 22160                                                                                       |
| Independent reflections                             | 9956 [ <i>R</i> (int) = 0.0582]                                                             | 11920 [ <i>R</i> <sub>int</sub> = 0.0369]                                                   |
| Data / restraints / parameters                      | 9956 / 0 / 748                                                                              | 11920/1/715                                                                                 |
| Goodness-of-fit on <i>F</i> <sup>2</sup>            | 1.007                                                                                       | 1.027                                                                                       |
| Final <i>R</i> indexes [ <i>I</i> ≥ 2σ( <i>I</i> )] | <i>R</i> <sub>1</sub> = 0.0374, <i>wR</i> <sub>2</sub> = 0.0855                             | <i>R</i> <sub>1</sub> = 0.0413, <i>wR</i> <sub>2</sub> = 0.1094                             |
| Final <i>R</i> indexes (all data)                   | <i>R</i> <sub>1</sub> = 0.0620, <i>wR</i> <sub>2</sub> = 0.0999                             | <i>R</i> <sub>1</sub> = 0.0431, <i>wR</i> <sub>2</sub> = 0.1111                             |
| Largest diff. peak/hole (e Å <sup>-3</sup> )        | 0.31/-0.35                                                                                  | 0.26/-0.36                                                                                  |

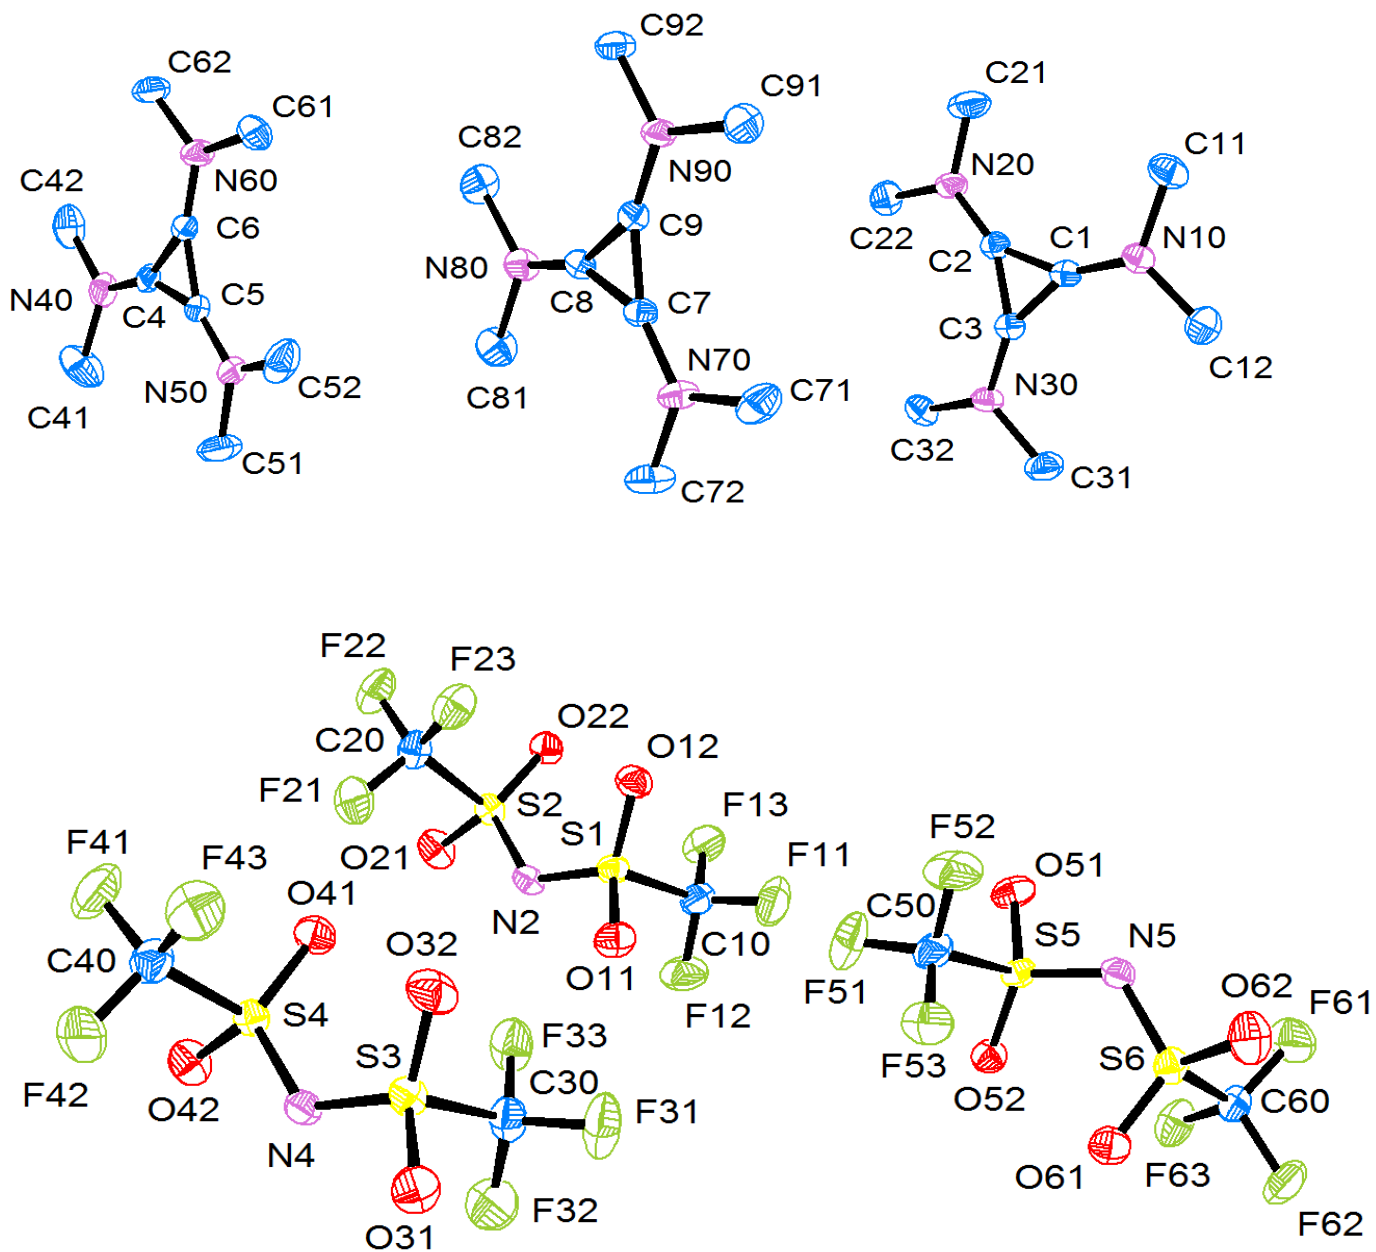

**Fig 8S.** Thermal ellipsoid plot (40% probability) of **3a** showing the atomic numbering scheme.

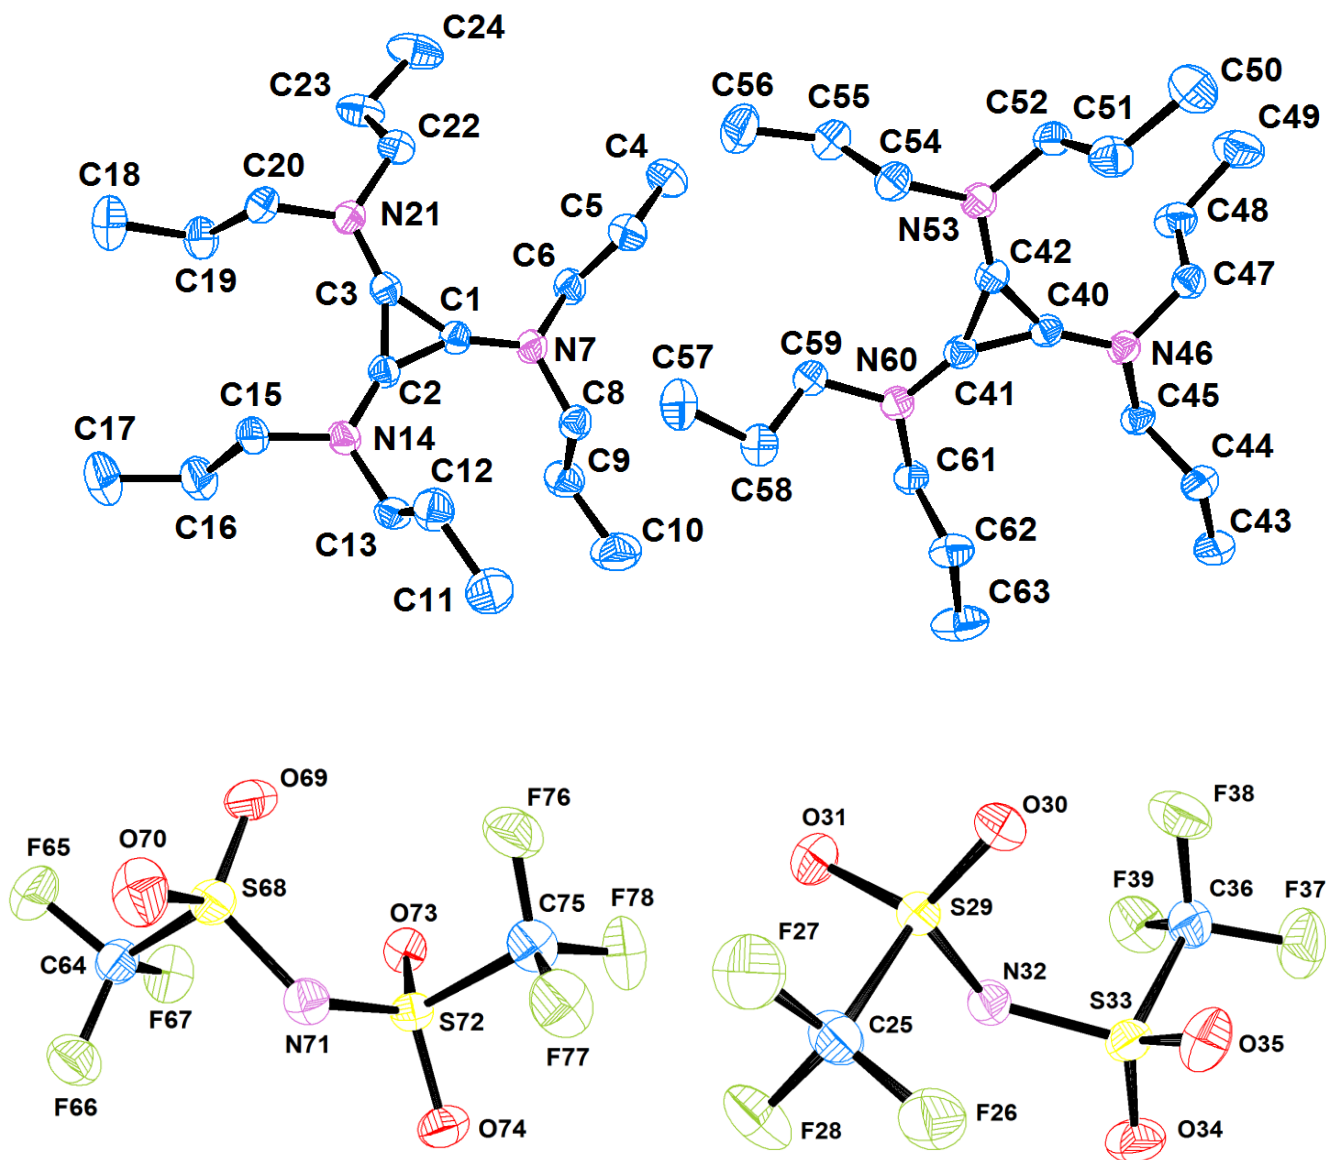

Fig 9S. Thermal ellipsoid plots (40% probability) of **3c** showing the atomic numbering scheme.

Table 12S. Bond Lengths for **3a**.

| Atoms |     | Length/Å   | Atoms |     | Length/Å   |
|-------|-----|------------|-------|-----|------------|
| C2    | C1  | 1.378(4)   | N10   | C1  | 1.328(3)   |
| C3    | C1  | 1.381(4)   | C2    | N20 | 1.326(3)   |
| C2    | C3  | 1.376(3)   | N30   | C3  | 1.327(3)   |
| N10   | C11 | 1.454(3)   | N10   | C12 | 1.456(3)   |
| N20   | C21 | 1.446(4)   | N20   | C22 | 1.448(4)   |
| N30   | C31 | 1.453(3)   | N30   | C32 | 1.457(3)   |
| C5    | C4  | 1.373(4)   | N40   | C4  | 1.326(3)   |
| C6    | C4  | 1.377(4)   | C5    | N50 | 1.320(3)   |
| C6    | C5  | 1.382(4)   | C6    | N60 | 1.321(3)   |
| N40   | C41 | 1.451(4)   | N40   | C42 | 1.447(4)   |
| N50   | C51 | 1.455(4)   | N50   | C52 | 1.447(4)   |
| N60   | C61 | 1.449(3)   | N60   | C62 | 1.448(3)   |
| C8    | C7  | 1.371(3)   | C7    | N70 | 1.326(3)   |
| C9    | C7  | 1.377(3)   | C8    | N80 | 1.325(3)   |
| C9    | C8  | 1.377(3)   | C9    | N90 | 1.322(3)   |
| N70   | C71 | 1.453(4)   | N70   | C72 | 1.449(4)   |
| N80   | C81 | 1.458(3)   | N80   | C82 | 1.455(3)   |
| N90   | C91 | 1.454(3)   | N90   | C92 | 1.453(3)   |
| S1    | N2  | 1.575(2)   | S2    | N2  | 1.578(2)   |
| S1    | O11 | 1.4316(18) | S2    | O21 | 1.4261(19) |
| S1    | O12 | 1.4257(18) | S2    | O22 | 1.4305(17) |
| S1    | C10 | 1.833(3)   | S2    | C20 | 1.833(3)   |
| F12   | C10 | 1.315(3)   | F21   | C20 | 1.321(3)   |
| F11   | C10 | 1.331(3)   | F22   | C20 | 1.332(3)   |
| F13   | C10 | 1.320(3)   | F23   | C20 | 1.324(3)   |
| S3    | N4  | 1.579(2)   | S4    | N4  | 1.571(2)   |
| S3    | O31 | 1.4281(19) | S4    | O41 | 1.4232(18) |
| S3    | O32 | 1.4215(19) | S4    | O42 | 1.4276(19) |
| S3    | C30 | 1.832(3)   | S4    | C40 | 1.823(3)   |
| F33   | C30 | 1.326(3)   | C40   | F43 | 1.318(3)   |
| F32   | C30 | 1.318(3)   | C40   | F42 | 1.326(3)   |
| F31   | C30 | 1.333(3)   | C40   | F41 | 1.326(3)   |
| S5    | N5  | 1.572(2)   | S6    | N5  | 1.577(2)   |
| S5    | O51 | 1.4271(18) | S6    | O61 | 1.4303(19) |
| S5    | O52 | 1.4246(17) | S6    | O62 | 1.422(2)   |
| S5    | C50 | 1.830(3)   | S6    | C60 | 1.833(3)   |
| F53   | C50 | 1.319(3)   | F63   | C60 | 1.329(3)   |
| F52   | C50 | 1.322(3)   | F62   | C60 | 1.333(3)   |
| F51   | C50 | 1.332(4)   | F61   | C60 | 1.311(3)   |

Table 13S. Bond Angles for **3a**.

| Atoms |     |     | Angle/°    | Atoms |     |     | Angle/°   |
|-------|-----|-----|------------|-------|-----|-----|-----------|
| O12   | S1  | O11 | 118.87(12) | F53   | C50 | F51 | 107.8(2)  |
| O12   | S1  | N2  | 116.51(11) | F52   | C50 | S5  | 111.5(2)  |
| O12   | S1  | C10 | 105.10(12) | F52   | C50 | F51 | 108.2(2)  |
| O11   | S1  | N2  | 107.45(11) | F51   | C50 | S5  | 109.1(2)  |
| O11   | S1  | C10 | 102.92(12) | N90   | C9  | C8  | 149.7(2)  |
| N2    | S1  | C10 | 104.00(13) | N90   | C9  | C7  | 150.6(2)  |
| O22   | S2  | N2  | 116.35(11) | C7    | C9  | C8  | 59.70(17) |
| O22   | S2  | C20 | 104.69(12) | C9    | N90 | C92 | 120.6(2)  |
| O21   | S2  | O22 | 118.83(11) | C9    | N90 | C91 | 121.1(2)  |
| O21   | S2  | N2  | 108.16(11) | C92   | N90 | C91 | 117.8(2)  |
| O21   | S2  | C20 | 103.01(13) | C7    | C8  | C9  | 60.12(17) |
| N2    | S2  | C20 | 103.69(12) | N80   | C8  | C9  | 150.2(2)  |
| O32   | S3  | N4  | 116.69(12) | N80   | C8  | C7  | 149.6(2)  |
| O32   | S3  | O31 | 119.09(12) | C8    | C7  | C9  | 60.18(17) |
| O32   | S3  | C30 | 104.68(13) | N70   | C7  | C9  | 150.4(2)  |
| N4    | S3  | C30 | 103.18(12) | N70   | C7  | C8  | 149.4(2)  |
| O31   | S3  | N4  | 107.61(11) | C8    | N80 | C82 | 120.9(2)  |
| O31   | S3  | C30 | 103.42(13) | C8    | N80 | C81 | 119.8(2)  |
| O42   | S4  | C40 | 102.67(13) | C82   | N80 | C81 | 119.1(2)  |
| O42   | S4  | N4  | 108.20(11) | C7    | N70 | C72 | 120.4(2)  |
| O41   | S4  | C40 | 104.49(12) | C7    | N70 | C71 | 121.7(2)  |
| O41   | S4  | O42 | 118.62(12) | C72   | N70 | C71 | 117.7(2)  |
| O41   | S4  | N4  | 116.86(11) | N60   | C6  | C5  | 151.0(3)  |
| N4    | S4  | C40 | 103.80(13) | N60   | C6  | C4  | 149.3(3)  |
| F43   | C40 | S4  | 112.1(2)   | C4    | C6  | C5  | 59.68(19) |
| F43   | C40 | F42 | 107.7(3)   | C6    | N60 | C62 | 119.9(2)  |
| F43   | C40 | F41 | 107.3(2)   | C6    | N60 | C61 | 121.4(2)  |
| F42   | C40 | S4  | 112.1(2)   | C62   | N60 | C61 | 118.5(2)  |
| F41   | C40 | S4  | 109.7(2)   | C4    | N40 | C42 | 119.6(2)  |
| F41   | C40 | F42 | 107.8(2)   | C4    | N40 | C41 | 118.7(3)  |
| S4    | N4  | S3  | 124.93(13) | C42   | N40 | C41 | 121.2(3)  |
| S1    | N2  | S2  | 125.02(13) | N50   | C5  | C6  | 150.1(3)  |
| F23   | C20 | S2  | 112.01(19) | N50   | C5  | C4  | 150.0(3)  |
| F23   | C20 | F22 | 107.2(2)   | C4    | C5  | C6  | 59.96(18) |
| F22   | C20 | S2  | 109.43(19) | C5    | N50 | C52 | 119.8(3)  |
| F21   | C20 | S2  | 111.6(2)   | C5    | N50 | C51 | 118.9(3)  |
| F21   | C20 | F23 | 108.5(2)   | C52   | N50 | C51 | 121.3(3)  |
| F21   | C20 | F22 | 108.0(2)   | N40   | C4  | C6  | 150.0(3)  |
| F13   | C10 | S1  | 112.26(19) | N40   | C4  | C5  | 149.7(3)  |
| F13   | C10 | F11 | 107.9(2)   | C5    | C4  | C6  | 60.36(19) |
| F12   | C10 | S1  | 111.6(2)   | C3    | N30 | C32 | 120.0(2)  |
| F12   | C10 | F13 | 108.7(3)   | C3    | N30 | C31 | 119.6(2)  |
| F12   | C10 | F11 | 107.7(2)   | C31   | N30 | C32 | 117.4(2)  |

|     |     |     |            |     |     |     |            |
|-----|-----|-----|------------|-----|-----|-----|------------|
| F11 | C10 | S1  | 108.6(2)   | C1  | N10 | C12 | 120.1(2)   |
| F33 | C30 | S3  | 112.1(2)   | C1  | N10 | C11 | 118.7(2)   |
| F33 | C30 | F31 | 107.3(2)   | C11 | N10 | C12 | 117.8(2)   |
| F32 | C30 | S3  | 112.09(19) | C3  | C2  | C1  | 60.21(18)  |
| F32 | C30 | F33 | 108.1(2)   | N20 | C2  | C3  | 150.8(3)   |
| F32 | C30 | F31 | 107.3(2)   | N20 | C2  | C1  | 149.0(3)   |
| F31 | C30 | S3  | 109.6(2)   | N30 | C3  | C2  | 150.3(3)   |
| O52 | S5  | O51 | 118.75(11) | N30 | C3  | C1  | 149.7(3)   |
| O52 | S5  | N5  | 117.31(11) | C2  | C3  | C1  | 59.96(18)  |
| O52 | S5  | C50 | 104.50(12) | C2  | N20 | C22 | 121.1(2)   |
| O51 | S5  | N5  | 107.69(11) | C2  | N20 | C21 | 119.8(2)   |
| O51 | S5  | C50 | 102.98(12) | C21 | N20 | C22 | 119.1(2)   |
| N5  | S5  | C50 | 103.33(13) | N10 | C1  | C2  | 149.2(2)   |
| O61 | S6  | N5  | 116.20(11) | N10 | C1  | C3  | 150.9(2)   |
| O61 | S6  | C60 | 104.71(12) | C2  | C1  | C3  | 59.83(18)  |
| O62 | S6  | O61 | 119.12(12) | F63 | C60 | S6  | 111.63(18) |
| O62 | S6  | N5  | 108.35(12) | F63 | C60 | F62 | 106.8(2)   |
| O62 | S6  | C60 | 103.40(13) | F62 | C60 | S6  | 109.4(2)   |
| N5  | S6  | C60 | 102.81(12) | F61 | C60 | S6  | 111.62(19) |
| S5  | N5  | S6  | 124.66(13) | F61 | C60 | F63 | 108.7(2)   |
| F53 | C50 | S5  | 112.51(19) | F61 | C60 | F62 | 108.5(2)   |
| F53 | C50 | F52 | 107.6(2)   |     |     |     |            |

Table 14S. Bond lengths for **3c**.

| Atoms |     | Length/Å |     | Length/Å |          |
|-------|-----|----------|-----|----------|----------|
| S29   | O30 | 1.427(2) | N53 | C52      | 1.464(4) |
| S29   | O31 | 1.430(2) | N53 | C54      | 1.465(4) |
| S29   | N32 | 1.570(3) | N21 | C3       | 1.325(4) |
| S29   | C25 | 1.836(3) | N21 | C22      | 1.470(4) |
| S72   | O73 | 1.427(2) | N21 | C20      | 1.470(4) |
| S72   | O74 | 1.430(2) | N7  | C8       | 1.466(4) |
| S72   | N71 | 1.568(3) | N7  | C1       | 1.332(4) |
| S72   | C75 | 1.835(4) | N7  | C6       | 1.467(4) |
| S33   | O35 | 1.430(3) | C40 | C42      | 1.381(4) |
| S33   | O34 | 1.430(3) | C40 | C41      | 1.388(4) |
| S33   | N32 | 1.574(3) | C42 | C41      | 1.388(4) |
| S33   | C36 | 1.830(4) | C2  | C3       | 1.389(4) |
| S68   | O69 | 1.428(3) | C2  | C1       | 1.381(4) |
| S68   | O70 | 1.422(3) | C8  | C9       | 1.518(5) |
| S68   | N71 | 1.579(3) | C45 | C44      | 1.520(4) |
| S68   | C64 | 1.828(4) | C15 | C16      | 1.512(5) |
| F26   | C25 | 1.321(4) | C52 | C51      | 1.527(4) |
| F28   | C25 | 1.324(4) | C47 | C48      | 1.516(5) |
| F39   | C36 | 1.324(4) | C13 | C12      | 1.517(5) |
| F67   | C64 | 1.323(4) | C3  | C1       | 1.384(4) |
| F77   | C75 | 1.323(4) | C61 | C62      | 1.520(4) |
| F66   | C64 | 1.326(4) | C22 | C23      | 1.514(5) |

|     |     |          |     |     |          |
|-----|-----|----------|-----|-----|----------|
| F65 | C64 | 1.334(4) | C51 | C50 | 1.521(5) |
| F76 | C75 | 1.313(5) | C44 | C43 | 1.519(5) |
| F38 | C36 | 1.326(4) | C54 | C55 | 1.520(5) |
| F78 | C75 | 1.340(5) | C20 | C19 | 1.514(4) |
| F27 | C25 | 1.322(4) | C55 | C56 | 1.521(5) |
| F37 | C36 | 1.326(4) | C9  | C10 | 1.520(6) |
| N46 | C40 | 1.334(4) | C6  | C5  | 1.518(5) |
| N46 | C45 | 1.464(4) | C19 | C18 | 1.532(5) |
| N46 | C47 | 1.463(4) | C59 | C58 | 1.518(5) |
| N14 | C2  | 1.329(4) | C58 | C57 | 1.523(5) |
| N14 | C15 | 1.464(4) | C62 | C63 | 1.521(5) |
| N14 | C13 | 1.466(4) | C12 | C11 | 1.528(6) |
| N60 | C61 | 1.464(4) | C48 | C49 | 1.519(6) |
| N60 | C41 | 1.322(4) | C5  | C4  | 1.526(6) |
| N60 | C59 | 1.469(4) | C24 | C23 | 1.524(6) |
| N53 | C42 | 1.330(4) | C16 | C17 | 1.527(6) |

Table 15S. Bond angles for **3c**.

| Atoms |     |     | Angle/°    | Atoms |     |     | Angle/°  |
|-------|-----|-----|------------|-------|-----|-----|----------|
| O30   | S29 | O31 | 118.50(15) | N14   | C15 | C16 | 112.6(3) |
| O30   | S29 | N32 | 116.73(14) | N53   | C52 | C51 | 112.5(3) |
| O30   | S29 | C25 | 104.68(14) | N46   | C47 | C48 | 113.4(3) |
| O31   | S29 | N32 | 108.72(15) | N14   | C13 | C12 | 112.8(3) |
| O31   | S29 | C25 | 104.07(16) | N21   | C3  | C2  | 150.3(3) |
| N32   | S29 | C25 | 101.79(15) | N21   | C3  | C1  | 149.9(3) |
| O73   | S72 | O74 | 118.44(15) | C1    | C3  | C2  | 59.7(2)  |
| O73   | S72 | N71 | 116.78(14) | N60   | C61 | C62 | 113.4(3) |
| O73   | S72 | C75 | 104.79(15) | N7    | C1  | C2  | 149.1(3) |
| O74   | S72 | N71 | 108.76(16) | N7    | C1  | C3  | 150.5(3) |
| O74   | S72 | C75 | 103.76(17) | C2    | C1  | C3  | 60.3(2)  |
| N71   | S72 | C75 | 101.94(16) | N21   | C22 | C23 | 113.0(3) |
| O35   | S33 | N32 | 116.84(15) | C50   | C51 | C52 | 112.0(3) |
| O35   | S33 | C36 | 104.46(17) | C43   | C44 | C45 | 110.4(3) |
| O34   | S33 | O35 | 118.73(18) | N60   | C41 | C40 | 150.4(3) |
| O34   | S33 | N32 | 108.08(17) | N60   | C41 | C42 | 149.9(3) |
| O34   | S33 | C36 | 103.26(17) | C42   | C41 | C40 | 59.7(2)  |
| N32   | S33 | C36 | 103.26(16) | N53   | C54 | C55 | 112.9(3) |
| O69   | S68 | N71 | 116.34(16) | F77   | C75 | S72 | 111.3(3) |
| O69   | S68 | C64 | 104.57(18) | F77   | C75 | F78 | 107.3(3) |
| O70   | S68 | O69 | 118.15(19) | F76   | C75 | S72 | 111.8(3) |
| O70   | S68 | N71 | 108.46(18) | F76   | C75 | F77 | 109.1(3) |
| O70   | S68 | C64 | 104.02(18) | F76   | C75 | F78 | 108.1(3) |
| N71   | S68 | C64 | 103.32(16) | F78   | C75 | S72 | 109.1(2) |
| C40   | N46 | C45 | 121.5(2)   | N21   | C20 | C19 | 113.2(2) |
| C40   | N46 | C47 | 118.7(3)   | C54   | C55 | C56 | 111.2(4) |
| C47   | N46 | C45 | 117.4(2)   | C8    | C9  | C10 | 111.0(3) |
| C2    | N14 | C15 | 122.0(3)   | N7    | C6  | C5  | 112.7(3) |
| C2    | N14 | C13 | 119.1(2)   | C20   | C19 | C18 | 110.4(3) |
| C15   | N14 | C13 | 117.9(3)   | N60   | C59 | C58 | 114.0(3) |
| C61   | N60 | C59 | 119.9(2)   | F26   | C25 | S29 | 111.1(2) |



|     |     |     |            |     |     |     |          |
|-----|-----|-----|------------|-----|-----|-----|----------|
| C41 | N60 | C61 | 120.3(2)   | F26 | C25 | F28 | 108.7(3) |
| C41 | N60 | C59 | 119.3(3)   | F26 | C25 | F27 | 108.1(3) |
| C42 | N53 | C52 | 120.3(2)   | F28 | C25 | S29 | 111.1(2) |
| C42 | N53 | C54 | 120.8(3)   | F27 | C25 | S29 | 109.8(2) |
| C52 | N53 | C54 | 118.4(3)   | F27 | C25 | F28 | 107.9(3) |
| C3  | N21 | C22 | 120.5(3)   | C59 | C58 | C57 | 110.5(3) |
| C3  | N21 | C20 | 119.6(3)   | C61 | C62 | C63 | 110.3(3) |
| C20 | N21 | C22 | 119.1(3)   | F39 | C36 | S33 | 111.3(2) |
| C8  | N7  | C6  | 117.8(2)   | F39 | C36 | F38 | 107.4(3) |
| C1  | N7  | C8  | 120.6(3)   | F39 | C36 | F37 | 108.6(3) |
| C1  | N7  | C6  | 121.1(3)   | F38 | C36 | S33 | 111.7(2) |
| N46 | C40 | C42 | 148.4(3)   | F37 | C36 | S33 | 109.8(3) |
| N46 | C40 | C41 | 151.4(3)   | F37 | C36 | F38 | 108.0(3) |
| C42 | C40 | C41 | 60.1(2)    | F67 | C64 | S68 | 111.2(3) |
| S72 | N71 | S68 | 125.42(17) | F67 | C64 | F66 | 108.6(3) |
| N53 | C42 | C40 | 149.9(3)   | F67 | C64 | F65 | 107.7(3) |
| N53 | C42 | C41 | 149.9(3)   | F66 | C64 | S68 | 111.5(2) |
| C40 | C42 | C41 | 60.2(2)    | F66 | C64 | F65 | 108.1(3) |
| S29 | N32 | S33 | 126.66(17) | F65 | C64 | S68 | 109.6(3) |
| N14 | C2  | C3  | 151.2(3)   | C13 | C12 | C11 | 111.1(3) |
| N14 | C2  | C1  | 148.9(3)   | C47 | C48 | C49 | 111.1(3) |
| C1  | C2  | C3  | 60.0(2)    | C6  | C5  | C4  | 109.9(4) |
| N7  | C8  | C9  | 113.5(3)   | C15 | C16 | C17 | 111.1(4) |
| N46 | C45 | C44 | 112.9(3)   | C22 | C23 | C24 | 111.5(4) |

## References

- (a) Z. Yoshida and Y. Tawara, *J. Am. Chem. Soc.*, 1971, **93**, 2573; (b) Z. Yoshida, *Top. Curr. Chem.*, 1973, **40**, 47.
- C. Wilcox and R. Breslow, *Tetrahedron Lett.*, 1980, **21**, 3241.
- D. R. MacFarlane, M. Forsyth, E. I. Izgorodina, A. P. Abbott, G. Annat and K. Fraser, *Phys. Chem. Chem. Phys.*, 2009, **11**, 4962.
- K. Machanová, A. Boisset, Z. Sedláková, M. Anouti, M. Bendová, J. Jacquemin, *J. Chem. Eng. Data*, 2012, **57**, 2227.
- M. G. Freire, C. M. S. S. Neves, K. Shimizu, C. E. S. Bernardes, I. M. Marrucho, J. A. P. Coutinho, J. N. C. Lopes and L. P. N. Rebelo, *J. Phys. Chem. B*, 2010, **114**, 15925.
- K. Řehák, P. Morávek and M. Strejc, *Fluid Phase Equilib.*, 2012, **316**, 17.
- J. Jacquemin P. Husson and A. A. H. Padua, V. Majer, *Green Chem.*, 2006, **8**, 172.
- J. G. Huddleston, A. E. Visser, W. M. Reichert, H. D. Willauer, G. A. Broker and R. D. Rogers, *Green Chem.*, 2001, **3**, 156.
- C. M. S. S. Neves, P. J. Carvalho, M. G. Freire, J. A. P. Coutinho, *J. Chem. Thermodynamics*, 2011, **43**, 948.
- Y. Cao, Y. Chen, X. Wang and T. Mu, *RSC Adv.*, 2014, **4**, 5169.
- E. J. Gonzalez and E. A. Macedo, *Fluid Phase Equilib.*, 2014, **383**, 72.
- M. G. Freire, P. J. Carvalho, R. L. Gardas, I. M. Marrucho, L. M. N. B. F. Santos and J. A. P. Coutinho, *J. Phys. Chem. B*, 2008, **112**, 1604.
- M. G. Freire, C. M. S. S. Neves, P. J. Carvalho, R. L. Gardas, A. M. Fernandes, I. M. Marrucho, L. M. N. B. F. Santos and J. A. P. Coutinho, *J. Phys. Chem. B*, 2007, **111**, 13082.
- J. Salminen, N. Papaiconomou, R. A. Kumara, J.-M. Lee, J. Kerr, J. Newmana and J. M. Prausnitz, *Fluid Phase Equilib.*, 2007, **261**, 421.
- N. Papaiconomou, J. Salminen, J.-M. Lee and J. M. Prausnitz, *J. Chem. Eng. Data*, 2007, **52**, 833.
- O. V. Dolomanov, L. J. Bourhis, R. J. Gildea, J. A. K. Howard and H. Puschmann, *J. Appl. Cryst.*, 2009, **42**, 339.
- G.M. Sheldrick, *Acta Cryst.*, 2008, **A64**, 112.
